# Supplementary material for: Haplogrouping mitochondrial DNA sequences in Legal Medicine/Forensic Genetics
Source: Springer Nature journal article supplement (doi:10.1007/s00414-012-0762-y), 2012-08-31
Supplement: MOESM1 [file 414_2012_762_MOESM1_ESM.doc]

**Supplementary File 1**

In what follows we comment on previous approaches to haplogrouping in the field of forensics by providing further examples from the literature. As a rule, given that our knowledge of the mtDNA phylogeny is improving continually with the availability of new bunches of partial or entire mtDNA genomes, haplogrouping of literature data needs regular updating, in particular when haplogroup frequencies from different publications are to be compared or assembled.

No haplogrouping

At the extreme, no haplogrouping at all is carried out with forensic population data, as was the case with a population study on Singapore Malays and one on "Proto-Malay tribes" . With hindsight, the haplogroup information may in part be inferred through near-matching with classified mtDNA samples from the studies and on the Malay population. For instance, the HVS-I type 16140C 16182C 16183C 16189C 16213C 16274A 16335G is shared by three of these datasets whereas in a fourth the additional mutation 16213C comes on top of this frequent Malay HVS-I motif. The accompanying majority HVS-II type is 73G 146C 150T 195C 309.1C 309.2C 263G. The papers and classify this haplotype as "B4c1b3". However, PhyloTree Build 13 does not harbor such a haplogroup label and in fact this name was given in the anthropological field without coding-region information, being based solely on the HVS-I motif (as in ). The proper haplogroup affiliation can now be seen when Ian Logan's haplogroup Website <http://www.ianlogan.co.uk/sequences_by_group/b4c_genbank_sequences.htm> for B4c is consulted: There are three complete mtDNA sequences matching the HVS-I&II type , which bear the two coding-region mutations 3571T and 8772C. In this haplotype has been referred to as "B4c1b2", which was introduced earlier in and then adopted by PhyloTree.

Obsolete haplogrouping

The concept of haplogroup is often misunderstood as a sort of cluster which does not correspond to a potential monophyletic clade of the mtDNA phylogeny. This may also be manifest in the adoption of insufficient or wrong criteria for haplogroup membership. In other cases, an obsolete scheme or an unnecessarily coarse scheme is employed.

The study was published at a time when more than 2000 complete mtDNA sequences were already available for phylogeny reconstruction (http://www.phylotree.org/mtDNA_seqs.htm). Most of these entire mtDNA genome data were available for querying on the mtDB Website (http://www.genpat.uu.se/mtDB/). According to haplogroups "*were determined by comparison of the defining characters to sites listed as important for distinguishing groups*", which does not explicitly demand that the “groups” be monophyletic. Indeed, 'U' designated an entity there disjoint from 'K', that is, it was not appreciated that K constitutes a subhaplogroup of the real haplogroup U. Actually, misnomers concerning haplogroup U are quite widespread: for instance, haplogroup U was named "U/K" in whereas the entity "U" was effectively treated as the paragroup U minus K in Table 1 of . Even with the knowledge at the time, the subdivisions of haplogroups J, K, and U5 into J1, J2 and K1, K2, and U5a, U5b, respectively, all went wrong in . Further, the claim "a*s others have noted, V appears as a subgroup of haplogroup H*" in was unjustified: possibly, haplogroup HV was meant instead of H. A motif such as "C16223T and T152C" for the sub-Saharan African haplogroup L3d is far too weak to be of any use, let alone aid in determining L3d status. In consequence, four (GRX127, GRX175, GRX112, and GRX241) of the five lineages classified under "L3d" actually belong to other haplogroups (N1b and N1a, respectively). When a motif does not sufficiently discriminate between different haplogroups, then inevitably some lineages get placed into the wrong slot. This also happened with the perceived "X" lineage GRX089, which clearly belongs to haplogroup L2a1 and most likely to L2a1a3, in particular. Back mutations at single motif sites were not always anticipated: for example, the haplogroup I3 lineage GRX006, which had undergone a back mutation at site 204, was no longer recognized as belonging to haplogroup I, but was shunted instead into the default category 'H' (which effectively embraced most of haplogroup R0 and included some other lineages as well).

Incorrect specification of subhaplogroups of R0 is quite widespread. Notoriously, "haplogroup H" is effectively treated as a kind of default category for haplogroup HV minus HV0, as done in . Similarly, haplogroup V is often written for the larger haplogroup HV0, without providing specific evidence for V status (either through near-matching with complete mtDNA sequences or screening of 4580G); see . Allocation to haplogroup U without specifying subhaplogroup status is bound to confuse U lineages with other R lineages or with particular HV lineages bearing 73G .

An outdated coding-region assay together with HVS-I sequencing is

bound to produce suboptimal or misleading haplogroup assignments. This is the case with the Genographic Project ; see . For instance, the "Panel of 22 Coding-Region SNPs used in the Genographic Project" (Figure 4 of ) employs site 3594, which is not characteristic of haplogroup L3 but of the larger haplogroup L3'4. Moreover, the employed subclassification of haplogroup M is extremely rudimentary and does not even recognize subhaplogroup G or any other M subhaplogroup known by 2002 .

A coarse haplogrouping scheme may leave samples unassigned or

misclassified, given the existing knowledge on the mtDNA phylogeny. For

example, the HVS-I profile 16209C 16223T 16292T 16295T 16311C 16519C

16527T (DOM18717) was allocated to “L3 (xM,N)” in Table S1 from , but there

can be no doubt that this is an L3f1b1 haplotype, even if one had no coding region information at hand. The entry DOM10751 from that same table of with the HVS-I profile 16093G 16189C 16223T 16287A 16293T 16301T 16311C 16355T 16362C 16399G was given "L0" status, but the first haplogroup that comes to mind is L4b2. To further substantiate this claim we have searched in Google the contiguous partial profile "16311C 16355T 16362C 16399G" for perfect matches in the worldwide databases. Then we are directed to a perfect match, even extending to the entire HVS-I profile, in http://www.familytreedna.com/ftGroups_mtdna_frame.aspx?Group=peters. The interesting feature there is that this HVS-I part is joined with HVS-II&III information (73G 146C 150T 152C 195C 244G 263G 309.1C 315.1C 513A), which on its own would equally point to haplogroup L4b2 because of the very rare variant 244G (with Soares et al. score equal to 1).

To mention some further instances, the unclassified samples AL142-AL144 from should have been allocated to haplogroup L3d and AL145 to haplogroup N1b1d. Further, the six sequences AL125-AL130 were allocated to haplogroup JT in , without further specification, although the division into haplogroups T1, T2, and J is obvious even with HVS-I variation alone. According to PhyloTree, those six sequences would now be specified as belonging to haplogroups J2b, J1c2, T2b, T2b, T2c, and T1a, respectively. In a similar fashion, the haplogroup status of virtually all entries of the sequence table in could be updated accordingly, leaving no sequences unassigned. The division into subhaplogroups of haplogroup J is in part supported by HVS-II information: for example, the HVS-II motif 73G 185A 188G 228A 263G 295T 309.1C 315.1C (as in samples VP44 of ) clearly indicates haplogroup J1c status, whereas 73G 242T 263G 295T 315.1C (as in sample VP61 of ) points to haplogroup J1b1a.

Hazardous haplogrouping

In a situation where complete mtDNA sequences are scarce for a geographic region such as Malaysia, haplogrouping of partial control-region sequences from that area can become hazardous. Both studies and display a considerable number of unassigned M haplotypes, which would typically point to novel haplogroups within haplogroup M that were not yet fully described. Take, for instance, the HVS-I&II&III sequences of a sample from , here displayed as haplotype no. 1 in Table 2, which has two near-matches (HA16 and HA17) in and two (Mal-41 and Mal-110 ) in . Whereas the latter study correctly labeled the latter haplotypes as M* at the time, the former haplotype was allocated to the Indian haplogroup M5 by , possibly because of the single shared variant nucleotide at the (hypervariable) site 16129.

In the case that mtDNA control-region profiles from geographical areas such as Northeast Africa with complex mtDNA variation were allocated to haplogroups without any screening of coding-region sites, a reassessment of the haplogroup assignments is recommended. This applies, for instance, to Table 1 of which displays entire control-region data from Egyptians. To give just three examples, consider (1) the perceived "R*" profile 16169T 16193T 16195C 16243C 73G 150T 152C 234G 249d 263G 315.1C 494T 523d 524d, (2) the two "N" profiles sharing the HVS-I motif 16041G 16223T, and (3) the presumed "N2" profiles 16176T 16209C 16223T 16234T 73G 189G 263G 315.1C 318C 523d 524d. In fact, these are haplotypes that were allocated by the authors within Eurasian haplogroups but unmistakably belong to the sub-Saharan haplogroups (1) L3x2a, (2) L3e5, and (3) L3f3, respectively. The weak motif 16223T 189G for haplogroup N2 may have been misleading since N2 encompasses only two sister haplogroups, W and N2a, with the latter being very rare, detected so far only in western Siberia. It would then need a compelling reason (such as pertinent coding-region information) for allocating some mtDNA profile to N2 but not to either W or N2a.

Incomplete sequencing that misses several variants and inappropriate criteria for haplogroup identification can even lead to misclassification at the continental scale. A case in question is the sequencing attempt by Gal et al. who have aimed at sequencing all 22 mitochondrial tRNA genes, all protein-coding genes, and the fragment ranging from position 15975 to 16420 (covering the HVS-I). The authors reported only nine mutations (including the well-known 9-bp deletion plus flanking changes) outside the control region and eight mutations in HVS-I. Since the 9-bp deletion together with 16189C typically define haplogroup B lineages of East Asia, Gal et al. inferred that this Hungarian mtDNA lineage belonged to this Asian haplogroup. But the HVS-I motif rather suggests membership to the European haplogroup T2, which is also confirmed by the partial coding-region profile (4216C 8697A 10463C 11812G). The majority of mutations that should have been detected, however, were missed by mistake – nonetheless haplogroup status T2 can be safely concluded. This can be further fine-classified into subhaplogroup T2f. Thus, seven out of ten T2f members currently stored in GenBank (http://www.ianlogan.co.uk/sequences_by_group/t2f_genbank_sequences.htm) additionally harbor the mutation C8270T, which may actually belong to the motif of T2f (as one has to reckon with some potential back mutation or oversight in three sequences from GenBank). The majority of those lineages belong to a specific subhaplogroup T2f1, which seems to be characterized by the variants 5277C, 5426C, 6489A, 15028A, 15043A, and 16298C. This subhaplogroup has been discussed in a medical context . Since the latter HVS-I mutation is not recorded in the patient's mtDNA, the final haplogroup status is T2f without further specification. This is also in line with a query in EMPOP, confirming that the partial profile 16126C 16140C 16189C 16294T 16296T 16311C within the region 16126-16311 delivers three matches, all of which belong to the West Eurasian forensic data. On the other hand, if we envision a multiplex analysis that includes SNPs for identifying haplogroup T and can also detect the 9-bp deletion, then one cannot yet reliably infer haplogroup T2f status (in the absence of HVS-I sequence information, say), since the 9-bp deletion also occurs in a particular haplogroup T2b lineage (GenBank accession number EU682394.2).

**References**

1. Wong HY, Tang JSW, Budowle B, Allard MW, Syn CKC, Tan-Siew WF, Chow ST (2007) Sequence polymorphism of the mitochondrial DNA hypervariable regions I and II in 205 Singapore Malays*.* Leg Med (Tokyo) 9(1):33-7

2. Lim LS, Ang KC, Mahani MC, Shahrom AW, Md-Zain BM (2010) Mitochondrial DNA polymorphism and phylogenetic relationships of Proto Malays in Peninsular Malaysia*.* J Biol Sci 10(2):71-83

3. Maruyama S, Nohira-Koike C, Minaguchi K, Nambiar P (2010) MtDNA control region sequence polymorphisms and phylogenetic analysis of Malay population living in or around Kuala Lumpur in Malaysia*.* Int J Legal Med 124(2):165-70

4. Nur Haslindawaty AR, Panneerchelvam S, Edinur HA, Norazmi MN, Zafarina Z (2010) Sequence polymorphisms of mtDNA HV1, HV2, and HV3 regions in the Malay population of Peninsular Malaysia*.* Int J Legal Med 124(5):415-26

5. Hill C, Soares P, Mormina M, Macaulay V, Clarke D, Blumbach PB, Vizuete-Forster M, Forster P, Bulbeck D, Oppenheimer S, Richards M (2007) A mitochondrial stratigraphy for island southeast Asia*.* Am J Hum Genet 80(1):29-43

6. Wang C-Y, Wang H-W, Yao Y-G, Kong Q-P, Zhang Y-P (2007) Somatic mutations of mitochondrial genome in early stage breast cancer*.* Int J Cancer 121(6):1253-6

7. Kong Q-P, Bandelt H-J, Sun C, Yao Y-G, Salas A, Achilli A, Wang C-Y, Zhong L, Zhu C-L, Wu S-F, Torroni A, Zhang Y-P (2006) Updating the East Asian mtDNA phylogeny: a prerequisite for the identification of pathogenic mutations*.* Hum Mol Genet 15(13):2076-86

8. Alvarez JC, Johnson DLE, Lorente JA, Martinez-espin E, Martinez-Gonzalez LJ, Allard MW, Wilson MR, Budowle B (2007) Characterization of human control region sequences for Spanish individuals in a forensic mtDNA data set*.* Legal Med 9:293-304

9. Grignani P, Turchi C, Achilli A, Peloso G, Alù M, Ricci U, Robino C, Pelotti S, Carnevali E, Boschi I, Tagliabracci A, Previderè C (2009) Multiplex mtDNA coding region SNP assays for molecular dissection of haplogroups U/K and J/T*.* Forensic Sci Int Genet 4(1):21-5

10. Cardoso S, Zarrabeitia MT, Valverde L, Odriozola A, Alfonso-Sánchez MA, de Pancorbo MM (2010) Variability of the entire mitochondrial DNA control region in a human isolate from the Pas Valley (northern Spain)*.* J Forensic Sci 55(5):1196-201

11. Barbosa AB, da Silva LA, Azevedo DA, Balbino VQ, Mauricio-da-Silva L (2008) Mitochondrial DNA control region polymorphism in the population of Alagoas state, north-eastern Brazil*.* J Forensic Sci 53(1):142-6

12. Behar DM, Rosset S, Blue-Smith J, Balanovsky O, Tzur S, Comas D, Mitchell RJ, Quintana-Murci L, Tyler-Smith C, Wells RS (2007) The Genographic Project public participation mitochondrial DNA database*.* PLoS Genet 3(6):e104

13. Bandelt H-J, Yao Y-G, Richards MB, Salas A (2008) The brave new era of human genetic testing*.* Bioessays 30(11-12):1246-51

14. Kivisild T, Tolk H-V, Parik J, Wang Y, Papiha SS, Bandelt H-J, Villems R (2002) The emerging limbs and twigs of the East Asian mtDNA tree*.* Mol Biol Evol 19(10):1737-51

15. Bryc K, Auton A, Nelson MR, Oksenberg JR, Hauser SL, Williams S, Froment A, Bodo J-M, Wambebe C, Tishkoff SA, Bustamante CD (2010) Genome-wide patterns of population structure and admixture in West Africans and African Americans*.* Proc Natl Acad Sci U S A 107(2):786-91

16. Zgonjanin D, Veselinović I, Kubat M, Furač I, Antov M, Lončar E, Tasić M, Vuković R, Omorjan R (2010) Sequence polymorphism of the mitochondrial DNA control region in the population of Vojvodina Province, Serbia*.* Leg Med (Tokyo) 12(2):104-7

17. Saunier JL, Irwin JA, Strouss KM, Ragab H, Sturk KA, Parsons TJ (2009) Mitochondrial control region sequences from an Egyptian population sample*.* Forensic Sci Int Genet 3(3):e97-103

18. Gal A, Pentelenyi K, Remenyi V, Pal Z, Csanyi B, Tomory G, Rasko I, Molnar MJ (2009) Novel heteroplasmic mutation in the anticodon stem of mitochondrial tRNALys associated with dystonia and stroke-like episodes*.* Acta Neurol Scand:20

19. Bandelt H-J, Parson W (2008) Consistent treatment of length variants in the human mtDNA control region: a reappraisal*.* Int J Legal Med 122(1):11-21

20. Montoya J, López-Gallardo E, Díez-Sánchez C, López-Pérez MJ, Ruiz-Pesini E (2009) 20 years of human mtDNA pathologic point mutations: carefully reading the pathogenicity criteria*.* Biochim Biophys Acta 1787(5):476-83
