# Supplementary material for: Haplogrouping mitochondrial DNA sequences in Legal Medicine/Forensic Genetics
Source: Springer Nature journal article supplement (doi:10.1007/s00414-012-0762-y), 2012-08-31
Supplement: MOESM2 [file 414_2012_762_MOESM2_ESM.xlsx]

## Sheet: Sheet1
Supplementary Table 1. Control-region haplogroup motifs (relative to the rCRS) distilled from PhyloTree Build 13.
Haplogroup	Extended HVS1 (16024-16569)	Extended HVS2 (1-576)
L0	16129 16187 16189 16223 16230 16278 16311	73 146 152 195 247
L0a'b'f'k	16129 16172 16187 16189 16223 16230 16278 16311	73 146 152 189 195 247
L0a'b'f	16129 16172 16187 16189 16223 16230 16278 16311	146 152 185 189 247 263
L0a'b	16129 16148 16172 16187 16189 16223 16230 16278 16311	93 (95C) 146 152 185 189 236 247 263
L0a	16129 16148 16172 16187 16188G 16189 16223 16230 16311 16320	93 (95C) 152 185 189 236 247 263
L0a1'4	16129 16148 16168 16172 16187 16188G 16189 16223 16230 16311 16320	93 (95C) 152 185 189 236 247 263
L0a1	16129 16148 16168 16172 16187 16188G 16189 16223 16230 16311 16320	93 (95C) 152 185 189 236 247 263
L0a1a	16129 16148 16168 16172 16187 16188G 16189 16223 16230 16311 16320	(64) 93 (95C) 152 185 189 236 247 263
L0a1a-200	16129 16148 16168 16172 16187 16188G 16189 16223 16230 16311 16320	(64) 93 (95C) 152 185 189 200 236 247 263
L0a1a1	16129 16148 16168 16172 16187 16188G 16189 16223 16230 16311 16320	(64) 93 (95C) 152 185 189 200 236 247 263
L0a1a2	16129 16148 16168 16172 16187 16188G 16189 16223 16230 16311 16320	(64) 93 (95C) 185 189 200 236 247 263
L0a1a3	16129 16148 16168 16172 16187 16188G 16189 16223 16230 16311 16320	(64) 93 (95C) 152 185 189 200 236 247 263
L0a1-16293	16129 16148 16168 16172 16187 16188G 16189 16223 16230 16293 16311 16320	93 (95C) 152 185 189 236 247 263
L0a1b	16129 16148 16168 16172 16187 16188G 16189 16223 16230 16278 16293 16311 16320	93 (95C) 152 185 189 236 247 263
L0a1b1	16129 16148 16168 16172 16187 16188G 16189 16223 16230 16278 16293 16311 16320	93 (95C) 185 189 236 247 263
L0a1b1a	16129 16148 16168 16172 16187 16188G 16189 16223 16230 16278 16293 16311 16320	93 (95C) 185 189 236 247 263
L0a1b1a1	16129 16148 16168 16172 16187 16188G 16189 16223 16230 16278 16293 16311 16320	93 (95C) 185 189 236 247 263
L0a1b2	16093 16129 16148 16168 16172 16187 16188G 16189 16223 16230 16278 16293 16311 16320	93 (95C) 152 185 189 236 247 263
L0a1b2a	16093 16129 16148 16168 16172 16187 16188G 16189 16223 16230 16278 16293 16311 16320	93 (95C) 152 185 189 236 247 263
L0a1c	16148 16168 16172 16187 16188G 16189 16223 16230 16287 16293 16311 16320	93 (95C) 152 185 189 236 247 263
L0a1d	16129 16148 16168 16172 16187 16188G 16189 16223 16230 16293 16311	93 (95C) 152 185 189 236 247 263 553
L0a4	16129 16148 16168 16172 16187 16188G 16189 16192 16223 16230 16234 16259A 16311 16319 16320	93 (95C) 185 189 236 247 263
L0a2	16148 16172 16187 16188G 16189 16223 16230 16311 16320	64 93 (95C) 152 189 236 247 263
L0a2a	16148 16172 16187 16188G 16189 16223 16230 16311 16320	64 93 (95C) 152 189 236 247 263
L0a2a1	16148 16172 16187 16188G 16189 16223 16230 16311 16320	64 93 (95C) 152 189 236 247 263
L0a2a1a	16148 16172 16187 16188G 16189 16223 16230 16311 16320	64 93 (95C) 152 189 236 247 263
L0a2a1a1	16148 16172 16187 16188G 16189 16223 16230 16311 16320	64 93 (95C) 152 189 236 247 263
L0a2a1a2	16148 16172 16187 16188G 16189 16223 16230 16311 16320	64 93 (95C) 152 189 236 247 263
L0a2a2	16148 16172 16187 16188G 16189 16223 16230 16311 16320	64 93 (95C) 152 189 204 207 236 247 263
L0a2a2a	16148 16172 16187 16188G 16189 16223 16230 16311 16320	64 93 (95C) 152 189 204 207 236 247 263
L0a2b	16148 16172 16187 16188A 16189 16223 16230 16242 16311 16320 16390	64 93 (95C) 236 247 263
L0a2b1	16148 16172 16187 16188A 16189 16223 16230 16242 16311 16320 16390	64 93 (95C) 236 247 263
L0a2c	16148 16172 16187 16188A 16189 16214 16223 16230 16234 16311	64 93 (95C) 152 189 194 236 247 263
L0a2d	16148 16172 16187 16188G 16189 16223 16230 16311 16320	64 93 (95C) 152 189 236 247 263
L0a3	16129 16148 16172 16187 16188G 16189 16223 16230 16311 16320	93 (95C) 152 185 189 207 236 247 263 318
L0b	16051 16129 16148 16164 16172 16189 16209 16230 16278 16287 16291 16311	64 93 (95C) 146 152 185 189 236 247 263
L0f	16129 16169 16172 16187 16189 16223 16230 16278 16311 16327 16354 16368	146 152 185 189 207 247 263
L0f1	16129 16169 16172 16174 16189 16223 16230 16278 16311 16327 16354 16368	151 152 189 207 247 263 482
L0f2	16129 16169 16172 16187 16189 16223 16230 16278 16311 16327 16354 16368	146 152 185 189 207 247 263
L0f2a	16129 16169 16172 16187 16189 16223 16230 16278 16311 16327 16368	146 152 185 189 207 247 263
L0f2a1	16129 16169 16172 16173 16187 16189 16223 16230 16239 16278 16311 16327 16368	143 146 152 185 189 247 263
L0f2b	16169 16172 16187 16189 16218 16223 16230 16278 16291 16311 16327 16354 16368	146 183 184 185 189 207 247 263
L0k	16129 16166C 16172 16187 16189 16214 16223 16230 16278 16291G 16311	73 146 152 189 195 247
L0k1	16166C 16172 16187 16189 16209 16214 16223 16230 16278 16291G 16311	73 146 152 189 195 198 247
L0k2	16129 16166C 16172 16187 16189 16214 16230 16278 16287 16291A 16311	73 146 152 189 195 199 204 215 247 294
L0d	16129 16187 16189 16223 16230 16243 16278 16311	73 146 152 195 247
L0d1'2	16129 16187 16189 16223 16230 16243 16311	73 146 152 195 247 498d
L0d1	16129 16187 16189 16223 16230 16243 16311	73 146 152 195 247 498d
L0d1-16234	16129 16187 16189 16223 16230 16234 16243 16311	73 146 152 195 247 498d
L0d1a	16129 16187 16189 16230 16234 16243 16266A 16311	73 146 152 195 199 247 498d
L0d1a1	16129 16187 16189 16230 16234 16243 16266A 16311	73 146 195 199 247 498d
L0d1c	16187 16189 16223 16230 16234 16243 16311	73 146 152 195 247 456 498d
L0d1c1	16167 16187 16189 16223 16230 16234 16242 16243 16311	73 146 152 195 198 247 456 498d
L0d1c1a	16167 16187 16189 16223 16230 16234 16242 16243 16311	73 146 152 195 198 247 456 498d
L0d1c1b	16167 16187 16189 16223 16230 16234 16242 16243 16311	73 146 152 195 198 247 456 498d
L0d1b	16129 16187 16189 16223 16230 16239 16243 16294 16311	73 146 152 195 247 498d
L0d1b1	16129 16187 16189 16223 16239 16243 16294 16311	73 146 152 195 247 498d (573.1CCCC)
L0d2	16129 16187 16189 16223 16230 16243 16311	73 146 152 195 247 498d
L0d2a'b	16129 16187 16189 16212 16223 16230 16243 16311	73 146 152 195 247 498d
L0d2a	16129 16187 16189 16212 16223 16230 16243 16311 16390	73 146 152 195 198 247 498d
L0d2a1	16129 16187 16189 16212 16223 16230 16243 16311 16390	73 146 152 195 198 247 498d
L0d2b	16069 16129 16169 16187 16189 16212 16223 16230 16243 16311	73 146 152 195 247 498d
L0d2c	16129 16187 16189 16223 16230 16243 16311	73 146 152 195 247 294A 498d
L0d3	16129 16187 16189 16223 16230 16243 16278 16290 16300 16311	73 146 150 152 195 247 316
L1-6	16129 16187 16189 16223 16278 16311	73 152 182 195 247 263
L1	16129 16187 16189 16223 16278 16311	73 152 182 195 247 263
L1b	16126 16187 16189 16223 16264 16270 16278 (16293) 16311	73 152 182 185T 195 247 263 357
L1b1	16126 16187 16189 16223 16264 16270 16278 (16293) 16311	73 152 182 185T 195 247 263 357
L1b1a	16126 16187 16189 16223 16264 16270 16278 (16293) 16311	73 152 182 185T 195 247 263 357
L1b1a1'4	16114A 16126 16187 16189 16223 16264 16270 16278 (16293) 16311	73 152 182 185T 195 247 263 357
L1b1a1	16114A 16126 16187 16189 16215 16223 16264 16270 16278 (16293) 16311	73 152 182 185T 195 247 263 264 357
L1b1a4	16114A 16126 16187 16189 16223 16264 16270 16278 (16293) 16311	73 152 182 185T 195 247 263 357
L1b1a2	16126 16187 16189 16223 16264 16270 16278 (16293) 16311	73 152 182 185T 195 247 263 357
L1b1a2a	16126 16187 16189 16223 16264 16270 16278 16289 (16293) 16311	73 152 182 185T 195 247 263 357
L1b1a-189	16126 16187 16189 16223 16264 16270 16278 (16293) 16311	73 152 182 185T 189 195 247 263 357
L1b1a3	16126 16187 16189 16223 16264 16270 16278 (16293) 16311	73 152 182 185T 189 195 247 263 357
L1b1a3a	16126 16187 16189 16223 16264 16270 16278 (16293) 16311	73 152 182 185T 189 195 247 263 357
L1b1a3a1	16126 16187 16189 16223 16264 16270 16278 (16293) 16311	73 152 182 185T 189 195 247 263 357
L1b1a9	16126 16187 16189 16223 16264 16270 16278 (16293) 16311	73 152 182 185T 189 195 247 263 357
L1b1a5	16126 16187 16189 16223 16264 16270 16278 (16293) 16311	73 152 182 185T 195 247 263 357
L1b1a6	(16093) 16126 16187 16189 16223 16264 16270 16278 (16293) 16311	73 152 182 185T 195 247 263 357
L1b1a7	16126 16187 16189 16223 16264 16270 16278 (16293) 16311	73 152 182 185T 195 247 263 357
L1b2'3	16126 16187 16189 16223 16264 16270 16278 (16293) 16311	73 152 182 185T 247 263 357
L1b2	16126 16187 16189 16223 16239 16264 16270 16278 (16293) 16311	73 152 182 185T 189 247 263 357
L1b3	16126 16187 16189 16223 16264 16270 16278 (16293) 16311	73 152 182 185T 247 263 357
L1c	16129 16187 16189 16223 16278 16294 16311 16360	73 151 152 182 186A 189C 195 247 263 316
L1c1'2'4'6	16129 16187 16189 16223 16278 16294 16311 16360	73 151 152 182 186A 189C 195 198 247 263 297 316
L1c1	16129 16187 16189 16223 16278 16293 16294 16311 16360	73 151 152 182 186A 189C 195 198 247 263 297 316
L1c1a	16129 16187 16189 16223 16278 16293 16294 16311 16360	73 151 152 182 186A 189C 195 247 263 297 316
L1c1a1	16129 16187 16189 16278 16293 16294 16311 16360	73 151 152 182 186A 189C 195 247 263 297 316
L1c1a1a	16129 16187 16189 16214 16234 16249 16278 16293 16294 16311 16360	44.1C 73 151 152 182 186A 189C 195 204 247 263 297 316
L1c1a1a1	16129 16187 16189 16214 16234 16249 16274 16278 16293 16294 16311 16360	44.1C 73 151 152 186A 189C 195 204 247 263 297 316 467
L1c1a1a1a	16129 16187 16189 16214 16234 16249 16274 16278 16294 16311 16360	44.1C 73 151 152 186A 189C 195 204 247 263 297 316 467
L1c1a1a1b	16051 16129 16187 16189 16214 16234 16249 16258 16274 16278 16293 16294 16311 16360	44.1C 73 151 152 186A 189C 195 247 263 297 316 467
L1c1a1a1b1	16051 16129 16187 16189 16214 16234 16249 16258 16274 16278 16293 16294 16311 16360	44.1C 73 151 152 186A 189C 195 247 263 297 316 467
L1c1a1a2	16187 16189 16214 16234 16249 16278 16293 16294 16311 16360	44.1C 73 151 152 182 186A 189C 195 204 247 263 297 316
L1c1a1b	16184 16187 16189 16278 16293 16294 16311	73 151 152 182 186A 189C 247 263 297 316
L1c1a2	16129 16187 16189 16223 16274 16278 16293 16294 16311 16360	73 93 95C 152 182 186A 189C 195 236 247 263 297 316
L1c1a2a	16129 16187 16189 16223 16274 16278 16293 16294 16311 16360	73 93 95C 152 182 186A 189C 195 236 247 263 297 316
L1c1a2a1	16129 16187 16189 16223 16274 16278 16293 16294 16311 16360	73 93 95C 152 182 186A 189C 195 236 247 263 297 316
L1c1a2a2	16129 16187 16189 16223 16274 16278 16293 16294 16311 16360	73 93 95C 152 182 186A 189C 195 236 247 263 297 316
L1c1a2b	16129 16187 16189 16223 16274 16278 16293 16294 16311 16360	73 93 95C 182 186A 189C 195 236 247 263 297 316
L1c1a2c	16129 16187 16189 16223 16274 16278 16293 16294 16311 16360	73 93 95C 152 182 186A 189C 195 236 247 263 297 316
L1c1b'c'd	16086 16129 16187 16189 16223 16278 16293 16294 16311 16360	73 151 152 182 186A 189C 195 198 247 263 297 316
L1c1b	16086 16129 16187 16189 16223 16241 16278 16291 16294 16311 16360	73 151 152 182 186A 189C 195 198 247 263 297 316
L1c1c'd	16086 16129 16187 16189 16223 16278 16293 16294 16311 16360	73 151 152 182 186A 189C 195 198 247 263 297 316
L1c1c	16086 16129 16169 16172 16189 16223 16234 16261 16278 16293 16311 16360	73 151 152 182 186A 189C 195 247 249d 263 297 316 534
L1c1d	16038 16086 16129 16187 16189 16223 16278 16293 16294 16311 16360	73 151 152 182 186A 189C 195 198 247 263 297 316
L1c2'4	16129 16187 16189 16223 16278 16294 16311 16360	73 151 152 182 186A 189C 195 198 247 263 297 316
L1c2	16129 16187 16189 16223 16265C 16278 16286G 16294 16311 16360 16527	73 151 152 182 186A 189C 195 198 247 263 297 316
L1c2a	16129 16187 16189 16223 16265C 16278 16286G 16294 16311 16360 16527	73 151 152 182 186A 189C 195 198 247 263 297 316
L1c2a1	16129 16145 16187 16189 16213 16223 16265C 16278 16286G 16294 16311 16360 16527	73 151 152 182 186A 189C 195 198 247 263 297 316
L1c2a1a	16129 16145 16187 16189 16213 16223 16265C 16278 16286G 16294 16311 16360 16527	73 151 152 182 186A 189C 195 198 247 263 297 316
L1c2a1b	16129 16145 16187 16189 16213 16223 16265C 16278 16286G 16294 16311 16360 16527	73 151 152 182 186A 189C 195 198 247 263 297 316
L1c2a2	16129 16187 16189 16223 16265C 16278 16286G 16288 16294 16311 16357 16527	73 151 152 182 186A 189C 195 198 247 263 297 316
L1c2b	16129 16187 16189 16223 16265C 16278 16286A 16294 16311 16360 16527	73 151 152 182 186A 189C 195 198 247 263 297 316
L1c2b1	16129 16187 16189 16223 16265C 16278 16286A 16294 16311 16360 16527	73 151 152 182 186A 189C 195 198 247 263 297 316
L1c2b2	16129 16187 16189 16223 16265C 16278 16286A 16294 16311 16320 16360 16527	73 151 152 182 186A 189C 195 198 247 263 297 316
L1c4	16129 16184 16187 16189 16223 16278 16294 16301 16311 16360	73 152 182 186A 189C 195 247 263 297 316
L1c4a	16037 16093 16129 16140 16184 16187 16189 16223 16278 16294 16301 16311 16360	73 152 182 186A 189C 195 247 263 280 297 316
L1c4b	16129 16184 16187 16189 16223 16278 16294 16301 16311 16360	73 146 152 182 186A 189C 195 247 263 291d 297 316
L1c6	16129 16187 16189 16223 16278 16294 16311 16360	73 151 152 182 186A 189C 195 198 247 263 297 316
L1c3	16129 16187 16189 16223 16278 16294 16311 16360	73 151 152 182 186A 189C 247 263 316
L1c3a	16129 16189 16215 16223 16278 16294 16311 16360	73 151 152 182 186A 189C 247 263 316
L1c3a1	16129 16189 16215 16223 16278 16294 16311 16360	73 151 152 182 186A 189C 247 263 316
L1c3a1a	16129 16189 16215 16223 16278 16294 16311 16360	73 151 152 182 186A 189C 247 263 316
L1c3a1b	16129 16189 16215 16223 16278 16294 16311 16355 16360	73 151 152 182 186A 189C 247 263 316
L1c3b'c	16129 16187 16189 16223 16278 16293 16294 16311 16360	73 151 152 182 186A 189C 247 263 316
L1c3b	16129 16163 16187 16189 16223 16278 16293 16294 16311 16360	73 151 152 182 186A 189C 247 263 316
L1c3b1	16129 16163 16187 16189 16223 16278 16293 16294 16311 16360	73 151 152 182 186A 189C 247 263 316
L1c3b1a	16129 16163 16187 16189 16209 16223 16278 16293 16294 16311 16360	73 151 152 182 186A 189C 247 263 316
L1c3b1b	16129 16163 16187 16189 16223 16278 16293 16294 16311 16360	73 151 152 182 186A 189C 247 263 316
L1c3b2	16086 16129 16163 16187 16189 16223 16278 16293 16294 16311 16360	73 151 152 182 186A 189C 247 263 316
L1c3c	16129 16187 16189 16223 16278 16293 16294 16311 16360	73 93 151 152 182 186A 189C 195 247 248 263 316 458
L2-6	16129 16187 16189 16223 16278 16311	73 182 195 247 263
L5	16129 16148 16166 16187 16189 16223 16278 16311	73 182 195 247 263 459.1C
L5a	16129 16148 16166 16187 16189 16223 16278 16311 16355 16362	73 152 182 195 247 263 455.1T 459.1C
L5a1	16129 16148 16166 16187 16189 16223 16278 16311 16355 16362	73 152 182 195 247 263 455.1TT 459.1C
L5a1a	16129 16148 16166 16187 16189 16223 16278 16311 16355 16362	73 152 182 195 247 263 455.1TT 459.1C
L5a1b	16129 16148 16166 16187 16189 16223 16278 16311 16355 16362	73 152 182 195 247 263 455.1TT 459.1C
L5a1c	16129 16148 16166 16187 16189 16223 16278 16311 16355 16362	73 152 182 195 247 263 455.1TT 459.1C 513
L5a2	16129 16148 16166 16187 16189 16192 16223 16278 16311 16355 16362	73 152 182 195 247 263 444 455.1T 459.1C 527
L5c	16111 16129 16148 16166 16187 16189 16223 16254 16278 16311 16360	73 182 195 247 249d 263 459.1C 535
L5c1	16111 16129 16148 16166 16187 16189 16223 16254 16278 16311 16360	73 182 195 247 249d 263 459.1C 524.1AC 535
L5c2	16111 16129 16148 16166 16187 16189 16223 16254 16278 16335 16360	73 195 247 249d 263 455.1T 459.1C 535
L2'3'4'6	16223 16278 16311	73 182 263
L2	16223 16278 16390	73 146 150 152 182 263
L2a-d	16223 16278 16390	73 146 150 152 182 195 263
L2a	16223 16278 16390	73 146 152 182 195 263
L2a1-4	16223 16278 16294 16390	73 146 152 182 195 263
L2a1	16223 16278 16294 16309 16390	73 146 152 195 263
L2a1a	16223 16278 16294 16309 16390	73 146 152 195 263
L2a1a1	16223 16278 16294 16309 16368 16390	73 146 152 195 263
L2a1a2	16223 16278 16286 16294 16309 16390	73 146 152 195 263
L2a1a2a	16223 16278 16286 16294 16309 16390	73 146 152 195 263
L2a1a2a1	16223 16278 16286 16294 16309 16390	73 146 152 195 263
L2a1a2b	16223 16278 16286 16294 16309 16390	73 146 152 195 263
L2a1a3	(16093) 16223 16278 16294 16309 16390	73 143 146 152 195 263
L2a1a3a	(16093) 16223 16278 16294 16309 16390	73 143 146 152 195 263
L2a1a3b	(16093) 16223 16278 16294 16309 16390	73 143 146 152 195 263
L2a1-16189-(16192)	16189 (16192) 16223 16278 16294 16309 16390	73 146 152 195 263
L2a1b	16189 (16192) 16223 16278 16294 16309 16390	73 146 152 195 263
L2a1b1	16189 (16192) 16223 16278 16290 16294 16309 16390	73 146 152 195 263
L2a1f	16189 (16192) 16223 16278 16294 16309 16390	73 146 152 195 263
L2a1f1	16189 (16192) 16223 16278 16294 16309 16390	73 146 152 195 263
L2a1-143	16223 16278 16294 16309 16390	73 143 146 152 195 263
L2a1c	16223 16278 16294 16309 16390	73 143 146 152 195 263
L2a1c1	16086 16223 16278 16294 16309 16390	73 143 146 152 195 198 263
L2a1c1a	16086 16223 16278 16294 16309 16390	73 143 146 152 195 198 263
L2a1c2	16213 16223 16278 16294 16309 16390	73 143 146 152 195 263
L2a1c2a	16193 16213 16223 16239 16278 16294 16309 16390	73 143 146 152 195 263 513
L2a1c3	16223 16278 16294 16309 16390	73 143 146 152 195 263
L2a1c4	16223 16278 16294 16309 16390	73 143 146 152 195 263
L2a1c4a	16223 16278 16294 16309 16390	73 143 146 152 195 263
L2a1c5	16129 16223 16278 16294 16309 16390	73 143 146 152 195 263
L2a1-143-16309!	16223 16278 16294 16390	73 143 146 152 195 263
L2a1d	16209 16223 16278 16294 16301 16354 16390	73 143 146 152 195 263
L2a1h	16223 16278 16294 16390	73 143 146 152 195 263
L2a1e	16223 16278 16294 16309 16390	73 143 146 152 195 263
L2a1e1	16223 16278 16294 16309 16390	73 143 146 152 195 263
L2a1-143-16189	16189 16223 16278 16294 16309 16390	73 143 146 152 195 263
L2a1i	16189 16223 16278 16294 16362 16390	73 143 146 152 195 263
L2a1i1	16189 16223 16278 16294 16362 16390	73 143 146 152 195 263
L2a1j	16189 16223 16278 16294 16309 16390	73 143 146 152 195 263
L2a1k	16189 16218 16223 16278 16294 16309 16390	73 143 146 152 195 263
L2a1-143-16189-16192	16189 16192 16223 16278 16294 16309 16390	73 143 146 152 195 263
L2a1l	16189 16192 16223 16278 16294 16309 16390	73 143 146 152 195 263 534
L2a1l1	16189 16192 16223 16278 16294 16309 16390	73 143 146 152 195 263 534
L2a1l1a	16189 16192 16223 16278 16294 16309 16390	73 143 146 152 195 263 534
L2a1l2	16189 16192 16223 16278 16294 16309 16390	73 143 146 152 195 263 534
L2a1m	16189 16192 16223 16278 16294 16309 16390	73 143 146 152 195 263
L2a1m1	16189 16192 16223 16278 16294 16309 16390	73 143 146 152 195 263
L2a1n	16189 16192 16223 16278 16294 16309 16390	73 143 146 152 195 263
L2a2'3'4	16189 16223 16229 16278 16294 16311 16390	73 152 182 195 263
L2a2'3	16189 16223 16229 16278 16291 16294 16311 16390	73 152 182 195 263
L2a2	16189 16223 16229 16278 16291 16294 16311 16390	73 152 182 195 263
L2a2a	16189 16223 16229 16278 16291 16294 16311 16390	73 152 182 195 263
L2a2a1	16189 16223 16229 16278 16291 16294 16311 16390	73 152 182 195 263
L2a2b	16189 16223 16229 16278 16291 16294 16311 16390	73 152 182 263
L2a2b1	16172 16189 16223 16229 16278 16291 16294 16311 16390	73 152 263
L2a3	16086 16189 16215 16223 16229 16278 16291 16294 16311 16390	73 152 182 257 263
L2a4	16170 16189 16223 16229 16278 16294 16311 16390	73 152 182 195 263 513 573.1CCC
L2a5	16066 16189 16223 16224 16278 16390	73 146 152 182 263 511
L2b'c'd	16223 16278 16390	73 146 150 152 182 195 263
L2b'c	16223 16278 16390	73 146 150 152 182 195 198 263
L2b	16114A 16129 16213 16223 16278 16390	73 146 150 152 182 195 198 204 263
L2b1	16114A 16129 16213 16223 16278 16362 16390	73 146 150 152 182 195 198 204 263 418
L2b1a	16114A 16129 16213 16223 16278 16355 16362 16390	73 150 152 182 195 198 204 263 418
L2b1a2	16114A 16129 16213 16223 16278 16355 16362 16390	73 150 152 182 195 198 204 263 418
L2b1a3	16114A 16129 16213 16223 16278 16355 16362 16390	73 150 152 182 195 198 204 263 418
L2b1b	16114A 16129 16213 16223 16278 16362 16390	73 146 150 152 182 195 198 204 263 385 418
L2b2	16114A 16129 16213 16223 16278 16390	73 146 150 152 182 195 198 204 263
L2b3	16114A 16129 16213 16223 16278 16390	73 146 150 152 182 195 198 204 263
L2c	16223 16278 16390	73 93 146 150 152 182 195 198 263 325
L2c1	16223 16278 16318 16390	73 93 146 150 152 182 195 198 263 325
L2c1a	16223 16278 16318 16390	73 146 150 152 182 195 198 263 325
L2c2	16223 16264 16278 16390	73 93 146 150 152 182 195 198 263 325
L2c2a	16223 16264 16278 16390	73 93 146 150 152 182 195 198 263 325
L2c2b	16223 16264 16278 16390	73 93 146 150 152 182 183 195 198 263 325
L2c3	16223 16278 16390	73 93 146 150 152 182 195 198 263 325 513
L2c3a	16223 16278 16390	73 93 146 150 152 182 195 198 263 325 513
L2c4	16223 16278 16390	73 93 146 150 152 182 195 198 263 325
L2c5	16223 16278 16390	73 93 146 150 152 182 195 198 263 325
L2d	16189 16278 16300 16354 16390 16399	73 146 150 195 263 456
L2d-16129	16129 16189 16278 16300 16354 16390 16399	73 146 150 195 263 456
L2d1	16129 16189 16278 16300 16354 16390 16399	73 146 150 195 263 456
L2d1a	16129 16189 16278 16300 16354 16390 16399	73 146 150 195 263 456
L2e	16111A 16145 16184 16223 16239 16278 16292 16355 16390 16399 16400	73 146 150 152 182 263 479
L2e1	16111A 16145 16184 16223 16239 16278 16292 16355 16390 16399 16400	73 146 150 152 182 263 479
L3'4'6	16223 16278 16311	73 182 263
L6	16048 16223 16224 16278 16311	73 146 152 182 185C 263
L6a	16048 16223 16224 16278 16311	73 146 152 182 185C 207 263 265
L6b	16048 16223 16224 16278 16311	73 146 152 182 185C 263
L3'4	16223 16311	73 263
L4	16223 16311 16362	73 195 263
L4a	16223 16260 16311 16362	73 195 198 263
L4a1	16207T 16223 16260 16311 16362	73 195 198 263 325
L4a1a	16207T 16223 16260 16311 16362	73 (150) 195 198 263 325
L4a2	16223 16260 16264 16311 16362	73 195 198 263
L4b	16223 16311 16362	73 195 263
L4b1	16179 16189 16223 16239 16311 16320 16362	73 150 199 204 263 513
L4b2	16223 16293T 16311 16355 16362 16399	73 146 195 244 263
L4b2a	16223 16293T 16311 16355 16362 16399	73 146 195 244 263
L4b2a1	16223 16274 16293T 16311 16355 16362 16399	73 146 152 195 244 263 471 547
L4b2a2	16172 16223 16293T 16311 16355 16362 16399	73 146 244 263
L4b2a2a	16172 16223 16293T 16311 16355 16362 16399	73 146 244 263
L4b2a2b	16172 16223 16287 16293T 16311 16355 16362 16399	73 146 244 263
L4b2b	(16114) 16223 16293T (16311) (16316) 16355 16362 16399	73 146 (152) 195 244 263 (340)
L3	16223	73 263
L3a	16223 16316	73 152 263
L3a1	16223 16254 16311 16316	73 152 263
L3b'f	16223	73 263
L3b	16124 16223 16278 16362	73 263
L3b1	16124 16223 16278 16362	73 263
L3b1a	16124 16223 16278 16362	73 263
L3b1a1	16124 16223 16278 16362	73 263
L3b1a2	16124 16223 16278 16362	73 263
L3b1a3	16124 16223 16278 16311 16362	73 263
L3b1a4	16124 16223 16278 16362	73 263
L3b1a5	16124 16223 16278 16362	73 263
L3b1a-152	16124 16223 16278 16362	73 152 263
L3b1a6	16124 16223 16278 16362	73 152 263
L3b1b	16124 16223 16278 16362	73 152 263
L3b1b1	16124 16223 16278 16362	73 152 217 263
L3b2	16124 16223 16278 16362 16527	73 263
L3b2a	16124 16189 16223 16278 16362 16527	73 263
L3f	16209 16223	73 263
L3f1	16209 16223	73 263
L3f1a	16209 16223	73 263
L3f1a1	16209 16223	73 263
L3f1b	16209 16223 16292 16311	73 189 (200) 263
L3f1b1	16209 16223 16292 16295 16311	73 189 (200) 263
L3f1b2	16209 16223 16292 16311	73 189 (200) 263
L3f1b2a	16172 16209 16223 16266A 16292 16311	73 189 (200) 263
L3f1b-150	16209 16223 16292 16311	73 150 189 (200) 263
L3f1b3	16209 16223 16292 16311	73 150 189 (200) 263
L3f1b4	16209 16223 16292 16311	73 150 189 (200) 263
L3f1b4a	16209 16223 16311	73 150 189 (200) 263
L3f1b4a1	16209 16223 16311	73 150 189 (200) 263
L3f2	16209 16223 16311	73 263
L3f2a	16209 16223 16311	73 152 263
L3f2a1	16209 16223 16311	73 152 263
L3f2b	16209 16223 16311	73 263 374.1A
L3f3	16176 16209 16223 16234	73 189 263 318
L3f3a	16176 16209 16223 16234 16284	73 189 263 318
L3c'd	16223	73 152 263
L3c	16223 16311 16362	73 152 195 263 498.1C
L3d	16124 16223	73 152 263
L3d1-5	16124 16223	73 152 263
L3d1	16124 16223	73 152 263
L3d1a	16124 16223	73 152 263
L3d1a-16319	16124 16223 16319	73 152 263
L3d1a1	16124 16223 16319	73 152 263
L3d1a1a	16124 16223 16319	73 150 152 263
L3d1b	16124 16223	73 152 263
L3d1b1	16124 16223	73 152 263
L3d1b3	16124 16223	73 146 152 263
L3d1c	16124 16166 16223	73 152 263
L3d1c1	16124 16166 16223	73 152 263
L3d1d	16124 16223 (16256) (16368)	73 152 263
L3d1-5-199	16124 16223	73 152 199 263
L3d2	16111 16124 16223	73 152 199 263
L3d5	16124 16223 (16362)	73 152 199 263
L3d3	16124 16223	73 152 263
L3d3a	16124 (16189) 16223 (16278) (16304) (16311)	73 152 263
L3d4	16124 16223	73 152 189 195 263
L3e'i'k'x	16223	73 150 263
L3e	16223	73 150 263
L3e1	16223 16327	73 150 189 200 263
L3e1a	16185 16223 16327	73 150 189 200 263
L3e1a1	16185 16223 16311 16327	73 150 185 189 200 263
L3e1a1a	16185 16223 16311 16327	73 150 185 189 200 263
L3e1a-152	16185 16223 16327	73 150 152 189 200 263
L3e1a2	16185 16209 16223 16327	73 150 152 189 195 200 207 263
L3e1a3	16185 16223 16327	73 150 152 189 200 263
L3e1b	16223 16325d 16327	73 150 189 200 263
L3e1c	16223 16327	73 150 189 200 263
L3e1d	16176 16223 16327	73 150 152 189 200 263
L3e1d1	16176 16223 16327	73 150 152 189 200 263
L3e1e	16223 16327	73 150 189 200 263
L3e1f	16189 16223 16327	73 150 189 200 263
L3e1g	16172 16223 16327 16399	73 150 189 200 263
L3e2	16223 16320	73 150 195 263
L3e2a	16223 16320	73 150 195 263
L3e2a1	16223 16320	73 150 195 198 263
L3e2a1a	16223 16320	73 150 195 198 263
L3e2a1b	16223 16320	73 150 195 198 263
L3e2a1b1	16223 16320 16399	73 150 195 198 263
L3e2a1b2	16223 16311 16320	73 150 195 198 263
L3e2b	16172 16189 16223 16320	73 150 195 263
L3e2b1	16172 16189 16223 16320	73 150 195 263
L3e2b1a	16172 16189 16223 16320	73 150 195 263
L3e2b1a1	16172 16189 16223 16320	73 150 195 263
L3e2b2	16172 16189 16223 16320	73 150 195 263
L3e2b-152	16172 16189 16223 16320	73 150 152 195 263
L3e2b3	16172 16189 16223 16320	73 150 152 195 263
L3e3'4'5	16223	73 150 263
L3e3'4	16223	73 150 263
L3e3	16223 16265T	73 150 195 263
L3e3a	16223 16265T	73 150 195 263 573.1C
L3e3b	16223 16265T	73 150 195 263
L3e3b1	16223 16265T	73 150 195 263
L3e4	16051 16223	73 150 263
L3e5	16041 16223	73 150 263 398
L3i	16223	73 150 263
L3i1	16153 16223	73 150 263
L3i1a	(16129) 16153 (16223)	73 150 263
L3i1b	16153 16223	73 150 263
L3i2	16223 16260 16311	73 150 152 189 263
L3k	16223	73 150 152 235 263 494
L3x	16169 16223	73 150 263
L3x1	16169 16223 16278	73 150 204 263
L3x1-16311	16169 16223 16278 16311	73 150 204 263
L3x1b	16169 16223 16256 16278 16311	73 150 204 263
L3x2	16169 16193 16195 16223	73 150 (200) 249d 263 494
L3x2a	16169 16193 16195	73 150 (200) 249d 263 494
L3x2a1	16086 16169 16193 16195	73 150 (200) 249d 263 368.1AGAA 494
L3x2a1a	16086 16169 16193 16195	73 150 (200) 249d 263 368.1AGAA 494
L3x2b	16169 16193 16195 16223 16243	73 150 (200) 249d 263 494
L3h	16223	73 263
L3h1	16223 16311	73 263
L3h1a	16223 16311	73 263
L3h1a1	(16129) (16192) 16223 (16255) (16298) 16311	(73) 263
L3h1a2	16223 16311	73 263
L3h1a2a	16223 16311 16399	73 146 263
L3h1a2b	16223 16270 16311	73 263
L3h1b	16223 16256A 16311	73 189C 195 263
L3h1b1	16223 16256A 16284 16311	73 189C 195 263
L3h1b1a	16179 16223 16256A 16284 16311	73 189C 195 263
L3h1b2	16129 16223 16256A 16311 16362	73 151 152 189C 195 263 294
L3h2	16111 16184 16223 16304	73 150 195 263 318
M	16223	73 263 489
M1'20'51	16223	73 263 489
M1	16129 16189 16223 16249 16311	73 195 263 489
M1a	16129 16189 16223 16249 16311	73 195 263 489
M1a1	16129 16189 16223 16249 16311 16359	73 195 263 489
M1a1a	16129 16189 16223 16311 16359	73 195 263 489
M1a1b	16129 16189 16223 16249 16311 16359	73 195 263 489
M1a1b1	16129 16189 16223 16249 16311 16359	73 195 263 489
M1a1-16093	16093 16129 16189 16223 16249 16311 16359	73 195 263 489
M1a1c	16093 16129 16189 16223 16249 16311 16359	73 195 263 489
M1a1d	16093 16129 16189 16223 16249 16311 16359	73 150 195 263 489
M1a1e	16129 16189 16223 16249 16311 16359	73 195 263 489
M1a2	16129 16189 16223 16249 16311	73 195 263 489
M1a2a	16129 16189 16223 16249 16311	73 152 195 263 315.1CCC 489 (513)
M1a2b	16129 16189 16223 16249 16260 16311 16320	73 195 263 489
M1a3	16129 16189 16249 16311	73 195 263 489
M1a3a	16129 16189 16249 16311	73 195 263 489
M1a3b	16129 16189 16249 16311	73 195 263 489
M1a4	16129 16189 16223 16249 16311	73 195 263 489
M1a5	16189 16223 16249 16311	73 195 263 489
M1b	16129 16189 16223 16249 16311	73 195 263 489
M1b1	16129 16185 16189 16223 16249 16311	73 195 263 466 489
M1b1a	16129 16185 16189 16223 16249 16311	73 195 200 263 466 489
M1b2	16129 16189 16223 16249 16311 16399	73 195 263 489
M1b2a	16129 16189 16223 16249 16291 16311 16399	73 195 263 489
M20	16129 16209 16223 16272 16362	73 152 225 249d 263 316 489
M51	16223 16278	73 150 263 489
M51a	16223 16278	73 150 263 489
M51a1	16223 16278 16294	73 150 263 489
M51a1a	16129 16223 16278 16294	73 150 185 263 489
M2	16223 16274	73 263 447G 489
M2a'b	16223 16274 16319	73 263 447G 489
M2a	16223 16274 16319	73 263 447G 489
M2a1	16223 16270 16274 16319 16352	73 204 263 447G 489
M2a1a	16223 16270 16319 16352	73 195 204 263 447G 489
M2a1a1	16223 16270 16319 16352	73 195 204 263 447G 489
M2a1a1a	16223 16270 16319 16352	73 195 204 263 447G 489
M2a1a1a1	16172 16223 16234 16270 16319 16352	73 195 204 263 447G 489
M2a1a1b	16223 16270 16319 16352	73 195 204 263 447G 489
M2a1a1b1	16223 16256 16270 16319 16352	73 195 204 263 447G 489
M2a1a2	16223 16243 16270 16319 16352	73 195 204 263 447G 489
M2a1a2a	16223 16243 16270 16319 16352	73 195 204 263 447G 489
M2a1a2a1	16223 16230 16243 16270 16319 16352	73 195 199 204 263 447G 489
M2a1a2a1a	16223 16230 16243 16270 16319 16352	73 195 199 204 263 447G 489
M2a1a-207	16223 16270 16319 16352	73 195 204 207 263 447G 489
M2a1a3	16223 16270 16319 16352	73 195 198 204 207 263 447G 482 489
M2a1a3-16093	16093 16223 16270 16319 16352	73 195 198 204 207 263 447G 482 489
M2a1a3a	16093 16223 16270 16295 16319 16352	73 195 198 204 207 263 447G 482 489
M2a1a3a1	16093 16147 16223 16270 16295 16319 16352	73 195 198 204 207 263 447G 482 489
M2a1a3b	16093 16223 16270 16319 16352	73 195 198 204 207 263 447G 482 489
M2a1b	16075 16223 16270 16274 16278 16319 16352	73 204 263 447G 489
M2a1c	16223 16270 16274 16319 16352	73 204 263 335 447G 489 526
M2a2	16223 16240C 16274 16311 16319	73 263 447G 489
M2a2a	16223 16240C 16274 16311 16319	73 263 447G 489
M2a3	16223 16274 16319	73 146 263 447G 489
M2a3a	16223 16265C 16274 16319	73 146 263 447G 489
M2b	16169.1C 16189 16223 16274 16319 16320	73 152 182 195 263 447G 489
M2b1	16169.1C 16189 16223 16274 16319 16320	73 152 182 195 263 447G 489
M2b1a	16169.1C 16189 16223 16256 16274 16319 16320	73 152 182 195 214 263 447G 489
M2b1b	16169.1C 16189 16223 16274 16319 16320	73 152 182 195 263 447G 471 489 549
M2b2	16169.1C 16189 16223 16274 16295 16319 16320	73 152 182 195 263 447G 489
M2c	16223 16274	73 263 447G 489
M3	16126 16223	73 263 482 489
M3a	16126 16223	73 263 482 489
M3a1	16126 16223	73 263 482 489
M3a2	16126 16223	73 263 482 489
M3a2a	16126 16223	73 150 263 482 489
M3b	16126 16223	73 263 482 489
M3c	16126 16223	73 263 482 489
M3c-152	16126 16223	73 152 263 482 489
M3c1	16189 16223 16294	73 152 263 482 489
M3c1a	16189 16223 16294	73 152 263 482 489
M3c1b	16179 16189 16223 16294	73 152 263 482 489
M3c1b1	16124 16179 16189 16223 16294	73 152 263 482 489
M3c1b1a	16124 16179 16189 16223 16294 16319	73 152 263 482 489
M3c1b1b	16124 16179 16189 16223 16294	73 152 263 482 489
M3c2	16126 16154 16223	73 263 482 489
M4"67	16223	73 263 489
M4"67-16311	16223 16311	73 263 489
M4	16145 16223 16261 16311	73 (152) 263 489
M65	16223 16311	73 263 489 511
M65a	16223 16289 16311	73 263 489 511
M65b	16223 16311	73 241 263 489 511
M67	16075 16169 16223 16311	73 143 263 489
M18'38	16223	73 246 263 489
M18	16223 16318T	73 246 263 489
M18a	16223 16318T	73 93 194 246 263 489
M38	16223	73 246 263 489
M38a	16223	73 189 246 263 489
M38-195	16223	73 195 246 263 489
M38b	16189 16223	73 146 153 195 246 263 489
M38c	16223	73 195 246 263 489
M38-199	16223	73 199 246 263 489
M38d	16093 16184 16223 16260A 16266	73 199 246 263 489
M38e	16223 16311	73 199 246 263 488 489
M30	16223	73 195A 263 489
M30a	16223	73 195A 263 489 513
M30a1	16223	73 195A 263 489 513
M30a2	16223	73 195A 263 489 513
M30b	16223	73 152 195A 263 489
M30c	16223	73 146 195A 263 489
M30c1	16166d 16223	73 146 195A 263 489
M30c1a	16166d 16223	73 146 195A 263 489
M30c1a1	16069 16166d 16223	73 146 195A 263 489
M30d	16223	73 195A 263 489
M30d1	16223	73 195A 263 489
M30-16234	16223 16234	73 195A 263 489
M30e	16223 16234	73 152 195A 263 489
M30f	16223 16368	73 195A 263 489
M37	16223	73 263 489
M37-152	16223	73 152 263 489
M37-152-151	16223	73 151 152 263 489
M37a	16223	73 151 152 263 489
M37a1	16223	73 151 152 263 489
M37d	16223	73 151 152 263 489
M37e	16111 16189 16223 16295	73 263 489
M37e2	16111 16189 16223 16224 16295	73 263 489
M43	16223	73 263 489
M43a	16223	73 263 489
M43b	16092 16223	73 263 489
M45	16189 16223	73 146 263 489
M45a	16189 16223 16300	73 143 146 152 263 489
M63	16172 16192 16223 (16248)	73 214 263 489
M64	16223 16263 16527	73 152 263 489
M66	16184 16223	73 195 263 489
M5	16129 16223	73 263 489
M5a'd	16129 16223	73 263 489
M5a	16129 16223	73 263 489
M5a1	16129 16223 16291	73 263 489
M5a1a	16129 16223 16291	73 (185) 263 (334) 489
M5a1b	16129 16223 16291	73 263 489
M5a2	16129 16223	73 263 489
M5a2a	16129 16223	73 263 489
M5a2a1	16129 16223	73 263 489
M5a2a1a	16129 16223 16265C	73 263 489
M5a2a2	16129 16144A 16223	73 263 489
M5a2a3	16114A 16129 16223	73 263 489
M5a3	16129 16223 16295	73 194 263 489
M5a3a	16129 16223 16295	73 194 263 489
M5a3b	16129 16189 16223 16295	73 194 263 489
M5a4	16129 16223 16224 16311	73 146 263 489
M5a5	16129 16223	73 263 489
M5d	16129 16223 16311	73 146 263 489
M5b'c	16129 16223	73 263 489
M5b	16129 16223	73 263 489
M5b1	16086 16108 16129 16223 16278	73 263 489
M5b2	16048 16129 16223	73 263 489
M5b2a	16048 16129 16223 16390	73 263 489
M5b2b	16048 16129 16223	73 263 489
M5c	16129 16223	73 263 489 575
M5c1	16129 16223	73 150 263 489 575
M5c2	16129 16223 16240 16291 16362	73 195 263 472 489 575
M6	16223 16362	73 263 461 489
M6a	16223 16231 16362	73 263 461 489
M6a1	16223 16231 16362	73 263 461 489
M6a2	16223 16231 16291 16319 16362	73 228 263 461 489
M6b	16184 16223 16256G 16311 16362	73 263 461 489
M7	16223	73 263 489
M7a	16209 16223	73 263 489
M7a-16324	16209 16223 16324	73 263 489
M7a1	16209 16223 16324	73 263 489
M7a1a	16209 16223 16324	73 263 489
M7a1a1	16209 16223 16324	73 263 489
M7a1a1a	16209 16223 16324	73 263 489
M7a1a2	16189 16209 16223 16324	73 207 263 489
M7a1a3	16209 16223 16324	73 263 489
M7a1a4	16209 16223 16324	73 263 489
M7a1a4a	16209 16223 16324	73 263 489
M7a1a5	16209 16223 16324	73 263 489
M7a1a6	16209 16223 16324	73 263 489
M7a1a7	16209 16223 16291 16324	73 263 489
M7a1a9	16209 16223 16324	73 263 489
M7a1b	16209 16223 16324	73 263 489
M7a2	16209 16223	73 263 489
M7a2a	16140 16209 16223	73 146 263 489
M7a2a1	16093 16140 16209 16223	73 146 263 489
M7a2a2	16140 16209 16223	73 146 263 489
M7b-g	16223	73 263 489
M7b'd'g	16223	73 263 489
M7b'd	16129 16223	73 263 489
M7b	16129 16223 16297	73 199 263 489
M7b1'2'4-8	16129 16223 16297	73 150 199 263 489
M7b1'2'4-8-(16192)	16129 (16192) 16223 16297	73 150 199 263 489
M7b1	16092 16129 (16192) 16223 16297	73 150 159 199 263 489
M7b5	16129 (16192) 16223 16297	73 150 199 263 489
M7b6	16129 (16192) 16223 16297	73 150 199 263 489
M7b1'2'4-8-16189	16129 16189 16223 16297	73 150 199 263 489
M7b2	16129 16189 16223 16297 16298	73 150 199 263 489
M7b2a	16129 16189 16223 16297 16298	73 150 199 263 489
M7b2b	16129 16189 16223 16297 16298	73 150 199 263 489
M7b2c	16129 16189 16223 16297 16298	73 150 195A 199 263 489
M7b7	16129 16189 16223 16297	73 150 199 263 489
M7b8	16129 16189 16223 16297	73 150 199 204 263 456 489
M7b4	16223 16297	73 150 199 204 263 489
M7b3	16086 16129 16297 16324	73 199 263 489
M7b3a	16086 16129 16297 16324	73 199 263 489
M7d	16129 16152 16179 16192 16223 16362	73 263 489
M7g	16184 16223	73 263 489
M7c'e'f	16223	73 146 263 489
M7c	16223 (16295)	73 146 199 263 489
M7c1	16223 (16295)	73 146 199 263 489
M7c1a	16223 (16295) 16319	73 146 199 263 489 513
M7c1b	16223 16294 (16295)	73 146 199 263 489
M7c1b1	16223 16294 (16295)	73 146 199 263 489
M7c1d	16223 (16295)	73 146 199 263 489
M7c2	16223 (16295)	73 146 199 263 489
M7c2a	16223 (16295)	73 146 199 263 489
M7c2b	16223 (16295)	73 146 199 263 489
M7c2b1	16172 16223 (16295)	73 146 199 263 489
M7c2b2	16223 (16295)	73 146 199 263 489
M7c3	16223 (16295)	73 146 199 263 489
M7c3a	16223 16249 (16295) 16319	73 146 199 263 489
M7c3b	(16295)	73 146A 199 263 489
M7c3c	16223 (16295) 16362	73 146 199 263 489
M7c3c1	16168 16223 (16295) 16362	73 146 199 263 489
M7e	16172 16223 16311	73 146 263 489
M7f	16111 16223 16278 16293C	73 146 263 489
M8	16223 16298	73 263 489
M8a	16223 16298 16319	73 263 489
M8a1	16223 16298 (16311) 16319	73 263 489
M8a2'3	16184 16223 16298 16319	73 263 489
M8a2	16184 16223 16298 16319	73 263 489
M8a2-152	16184 16223 16298 16319	73 152 263 489
M8a2a	16184 16189 16223 16298 16319 16470 16471	73 152 263 489
M8a2b	16184 16223 16298 16319	73 152 263 489
M8a3	16184 16223 16298 16319	73 263 489
M8a3a	16134 16184 16223 16298 16319	73 263 489
CZ	16223 16298	73 249d 263 489
C	16223 16298 16327	73 249d 263 489
C1	16223 16298 16325 16327	73 249d 263 290-291d 489
C1a	16223 16298 16325 16327 16356	73 249d 263 290-291d 489
C1b	16223 16298 16325 16327	73 249d 263 290-291d 489 493
C1b1	16223 16298 16325 16327	73 249d 263 290-291d 489 493
C1b2	16223 16298 16325 16327	73 249d 290-291d 489 493
C1b3	16223 16298 16325 16327	73 249d 263 290-291d 489 493
C1b4	16086 16189 16223 16278 16298 16325 16327	73 143 249d 263 290-291d 489 493
C1b5	16223 16298 16325 16327	73 249d 263 290-291d 489 493
C1b5a	16223 16298 16325 16327	73 249d 263 290-291d 489 493
C1b6	16223 16271 16298 16325 16327 16357	73 249d 263 290-291d 489 493
C1b-16311	16223 16298 16311 16325 16327	73 249d 263 290-291d 489 493
C1b7	16223 16298 16311 16325 16327	73 249d 263 290-291d 489 493
C1b7a	16223 16298 16311 16325 16327	73 249d 263 290-291d 489 493
C1b10	16129 16172 16223 16298 16311 16325 16327	73 146 249d 263 290-291d 385 489 493
C1b8	16223 16298 16325 16327 16362	73 249d 263 290-291d 489 493
C1b8a	16223 16298 16325 16327 16362	73 249d 263 290-291d 489 493
C1b9	16223 16298 16325 16327	73 249d 263 290-291d 489 493
C1b9a	16223 16298 16325 16327	73 198 249d 263 290-291d 489 493
C1b11	16223 16295 16298 16325 16327	73 194 249d 263 290-291d 489 493
C1c	16223 16298 16325 16327	73 249d 263 290-291d 489
C1c1	16223 16298 16325 16327	73 215 249d 263 290-291d 489
C1c1a	16223 16298 16325 16327	73 215 249d 263 290-291d 489
C1c2	16223 16298 16325 16327	73 249d 263 290-291d 489
C1c3	16223 16298 16325 16327	73 249d 263 290-291d 489
C1c4	16223 16274 16298 16325 16327	73 214 249d 263 290-291d 489
C1c5	16223 16298 16325 16327 16526	73 249d 263 290-291d 489
C1d	16051 16223 16298 16325 16327	73 249d 263 290-291d 489
C1d-194	16051 16223 16298 16325 16327	73 194 249d 263 290-291d 489
C1d1	16051 16223 16298 16325 16327	73 194 249d 263 290-291d 489
C1d1a	16051 16223 16298 16325 16327	73 194 249d 263 290-291d 489
C1d1a1	16051 16223 16298 16325 16327	73 194 249d 263 290-291d 489
C1d1b	16051 16223 16298 16325 16327	73 194 195 249d 263 290-291d 489
C1d1b1	16051 16223 16298 16325 16327	73 194 195 249d 263 290-291d 489
C1d1c	16051 16188 16223 16298 16325 16327 16362	73 194 249d 263 290-291d 489
C1d1c1	16051 16188 16223 16325 16327 16362	73 249d 263 290-291d 489
C1d2	16051 16223 16298 16325 16327	73 194 249d 263 290-291d 489
C1d2a	16051 16209 16223 16298 16325 16327	73 194 249d 263 290-291d 489
C1e	16223 16298 16311 16325 16327	73 152 249d 263 290-291d 489 534
C4	16223 16298 16327	73 249d 263 489
C4a'b'c	16223 16298 16327	73 249d 263 489
C4a	16223 16298 16327	73 249d 263 489
C4a1'5	16223 16298 16327	73 249d 263 489
C4a1	(16093) 16223 16298 16327	73 249d 263 489
C4a1-16129	(16093) 16129 16223 16298 16327	73 249d 263 489
C4a1a	(16093) 16129 16223 16298 16327	73 249d 263 489
C4a1-16129-195	(16093) 16129 16223 16298 16327	73 195 249d 263 489
C4a1b	(16093) 16129 16223 16298 16327	73 195 249d 263 489
C4a1c	(16093) 16129 16223 16298 16327	73 195 249d 263 489
C4a1c1	(16093) 16129 16223 16298 16327	73 195 249d 263 489
C4a1c1a	(16093) 16129 16223 16298 16327	73 195 249d 263 489
C4a1c2	(16093) 16129 16223 16298 16327	73 195 249d 263 489
C4a1d	(16093) 16129 16223 16298 16327	73 195 249d 263 489
C4a5	16129 16192 16223 16298 16327	73 249d 263 489
C4a2'3'4	16223 16298 16327 16357	73 249d 263 489
C4a2	16171 16223 16298 16327 16344 16357	73 249d 263 489
C4a3	16223 (16278) 16298 16327 16357	73 249d 263 489
C4a3a	16086 16223 (16278) 16298 16327 16357	73 249d 263 489
C4a3b	16223 (16278) 16298 16311 16327 16357	73 249d 263 489
C4a4	16223 16298 16327 16357	47 73 249d 263 489
C4a4a	16223 16239 16298 16327 16357	47 73 207 249d 263 489
C4b	16223 16298 16327	73 249d 263 489
C4b1	16223 16298 16327	73 146 249d 263 489
C4b1a	16223 16259.1A 16298 16327	73 146 249d 263 489
C4b2	16124 16223 16298 16318T 16327	73 249d 263 489
C4b3	16223 16291 16298 16327	73 249d 263 489
C4b3a	16223 16291 16298 16327	73 249d 263 489
C4b5	16223 16298 16327	73 249d 263 489
C4b6	16223 16298 16327	73 249d 263 489
C4b7	16223 16298 16327	73 249d 263 489
C4b8	16093 16223 16298 16327	73 249d 263 489
C4c	16223 16298 16327	73 249d 263 489
C4c1	16223 16298 16327	73 249d 263 489
C4c1a	16223 16241 16298 16327	73 249d 263 489
C4c1b	16189 16223 16298 16327	73 249d 263 489
C4c2	16223 16298 16327	96 105-110d 114 189 249d 263 473 489
C4-152	16223 16298 16327	73 152 249d 263 489
C4-152-16093	16093 16223 16298 16327	73 152 249d 263 489
C4d	16093 16223 16298 16327	73 152 249d 263 489
C4e	16223 16298 16327	73 151 152 249d 263 489
C5	16223 16288 16298 16327	73 249d 263 489
C5a	16223 16261 16288 16298	73 249d 263 489
C5a1	16223 16261 16288 16298	73 249d 263 489
C5a2	16093 16223 16261 16288 16298	73 249d 263 489
C5b	16223 16288 16298 16327	73 249d 263 489
C5b1	16148 16223 16288 16298 16327	73 249d 263 489
C5b1a	16148 16223 16288 16298 16327	73 249d 263 489
C5b1a1	16148 16223 16288 16298 16327	73 249d 263 489
C5b1b	16148 16164 16223 16288 16298 16327	73 249d 263 489
C5-16093	16093 16223 16288 16298 16327	73 249d 263 489
C5c	16093 16223 16288 16298 16327 16518T 16527	73 249d 263 489
C5c1	16093 16223 16234 16288 16298 16327 16518T 16527	73 249d 263 489
C5c1a	16093 16223 16234 16288 16298 16327 16518T 16527	73 249d 263 489
C5d	16093 16223 16288 16298 16327	73 249d 263 489
C5d1	16093 16223 16288 16298 16327 16390	73 249d 263 489
C5d2	16093 (16148) 16223 (16284) 16288 16298 16327	73 (207) 249d 263 489
C7	16223 16298 16327	73 249d 263 489
C7a	16223 16298 16327	73 249d 263 489
C7a1	16223 16298 16327	73 146 249d 263 489
C7a1a	16223 16298 16327	73 146 153 249d 263 489
C7a1a1	16223 16327	73 146 151 153 249d 263 333 489
C7a1a2	16223 16298 16311 16327	73 146 153 249d 263 489
C7a1c	16223 16298 16327	73 146 249d 263 489
C7a1d	16223 16242 16256 16298 16327	73 146 249d 263 489
C7a2	16189 16223 16298 16327	73 249d 263 489
C7-16051	16051 16223 16298 16327	73 249d 263 489
C7b	16051 16223 16298 16327	73 249d 263 489
Z	16185 16223 16260 16298	73 249d 263 489
Z-152	16185 16223 16260 16298	73 152 249d 263 489
Z1	16185 16223 16260 16298	73 152 249d 263 489
Z1a	16129 16185 16223 16224 16260 16298	73 151 152 249d 263 489
Z1a1	16129 16185 16223 16224 16260 16298	73 151 152 249d 263 489
Z1a1a	16129 16185 16223 16224 16260 16298	73 151 152 249d 263 489
Z1a2	16129 16185 16223 16224 16260 16298	73 151 152 249d 263 489
Z2	16185 16223 16260 16298	73 152 249d 263 489
Z3	16185 16223 16260 16298	73 152 249d 263 489
Z3a	16185 16223 16260 16298	73 152 207 249d 263 489
Z3a1	16185 16223 16260 16298	73 152 207 249d 263 489
Z3a1a	16185 16223 16260 16298	73 152 207 249d 263 489
Z3a2	16185 16223 16260 16298	73 152 207 249d 263 489
Z3b	16185 16223 16260 16298	73 146 152 249d 263 489
Z4	16185 16223 16260 16298 (16302)	73 152 249d 263 489
Z4a	16185 16189 16223 16260 16298 (16302)	73 152 249d 263 489
Z7	16185 16223 16260 16298	73 152 249d 263 489
Z5	16185 16223 16260 16298	73 249d 255 263 489
M9	16223 16362	73 263 489
M9a'b	16223 16362	73 153 263 489
M9a	16223 16234 16362	73 153 263 489
M9a1	16223 16234 16362	73 153 263 489
M9a1a	16223 16234 16316 16362	73 153 263 489
M9a1a1	16223 16234 16316 16362	73 153 263 489
M9a1a1a	16223 16234 16316 16362	73 263 489
M9a1a1b	16223 16234 16300 16316 16362	73 153 263 489
M9a1a1c	16223 16234 16291 16316 16362	73 153 263 489
M9a1a1c1	16223 16234 16291 16316 16362	73 153 263 489
M9a1a1c1a	16223 16234 16291 16316 16362	73 153 263 489
M9a1a1c1b	16223 16234 16316 16362	73 153 263 489
M9a1a1d	16223 16234 16316 16362	73 153 263 489
M9a1a2	16145 16223 16234 16316 16362	73 153 263 489
M9a1b	16223 16234 16362	73 152 153 263 489
M9a1b-150	16223 16234 16362	73 150 152 153 263 489
M9a1b1	16158 16223 16234 16362	73 150 152 153 263 489
M9a1b1a	16158 16223 16234 16362	73 150 152 153 263 489
M9a1b1a1	16158 16223 16234 16362	73 150 152 153 263 489
M9a1b1b	16158 16223 16234 16362	73 150 152 153 263 489
M9a1b1c	16158 16223 16234 16362	73 150 152 153 263 489
M9a1b2	16223 16234 16362	73 150 152 153 263 489
M9a4	16223 16234 16362	73 153 263 489
M9a4a	16223 16234 16271 16362	73 153 263 489
M9a4a1	16223 16234 16271 16362	73 153 263 489
M9a5	16223 16234 16362	73 153 263 385 489
M9b	16051 16209 16223 16362	73 153 263 489 573.1C
E	16223 16362 16390	73 263 489
E1	16223 16362 16390	73 263 489
E1a	16223 16362 16390	73 263 489
E1a1	16223 16362 16390	73 263 489
E1a1a	16223 16291 16362 16390	73 263 489
E1a1a1	16223 16291 16362 16390	73 263 489
E1a2	16223 16362 16390	73 263 373 489
E1a2a	16223 16362 16390	73 263 373 489
E1b	16223 16362 16390	73 152 263 489
E1b-16261	16223 16261 16362 16390	73 152 263 489
E1b1	16223 16261 16362 16390	73 152 263 489
E2	16051 16223 16362 16390	73 195 263 489
E2a	16051 16223 16362 16390	73 195 263 489
E2a1	16051 16223 16362 16390	73 195 263 489
E2a3	16051 16185 16223 16362 16390	73 195 263 489
E2b	16051 16185 16223 16362 16390	73 195 263 489
E2b1	16051 16086 16185 16223 16362 16390	73 195 263 489
E2b2	16051 16129 16185 16223 16362 16390	73 195 263 489
M10	16223 16311	73 263 489 573.1C
M10a	16223 16311	73 263 489 573.1C
M10a1	16129 16223 16311	73 263 489 573.1C
M10a1a	16093 16129 16223 16311 16357 16497	73 263 489 573.1C
M10a1a1	16093 16129 16223 16311 16357 16497	73 263 489 573.1C
M10a2	16066 16223 16311	73 263 489 573.1C
M11	16223	73 215 263 318 326 489
M11a'b	16223	73 (200) 215 263 318 326 489
M11a	16223	73 198 (200) 215 263 318 326 489
M11a1	16223	73 198 (200) 215 263 318 326 489
M11a2	16173 16223	73 146 198 (200) 215 263 318 326 489
M11b	16223	73 (200) 215 263 318 326 489
M11c	16169 16223	73 215 263 318 326 489
M12'G	16223	73 263 489
M12	16223 16234 16290	73 263 489
M12a	16223 16234 16290	73 263 318 489
M12a1	16223 16234 16290	73 125 127 128 263 318 489
M12a1a	16223 16234 16290	73 125 127 128 263 318 489
M12a1b	16172 16223 16234 16290	73 125 127 128 263 489
M12a2	16223 16234 16261 16290	73 263 318 463 489 573.1C
M12b	16129 16172 16223 16234 16290	73 263 489
G	16223 16362	73 263 489
G1	16223 16362	73 263 489
G1a	16223 16362	73 150 263 489
G1a1	16223 16325 16362	73 150 263 489
G1a1a	16223 16325 16362	73 150 263 489
G1a1a1	16223 16325 16362	73 150 263 489
G1a1a2	16223 16325 16362	73 150 263 489
G1a1a3	16187 16223 16325 16362	73 150 263 489
G1a1a4	16223 16325 16362	73 150 263 489
G1a2'3	16184 16223 16362	73 150 263 489
G1a2	16184 16223 16290 16362	73 150 263 489
G1a3	16184 16214 16223 16362	73 200 263 489
G1b	16129 16223	73 (207) 263 489
G1c	16223 16362	73 263 489
G2	16223 16362	73 263 489
G2a	16223 16227 16278 16362	73 263 489
G2a1	16223 16227 16278 16362	73 263 489
G2a1b	16223 16227 16278 16362	73 146 207 263 489
G2a1-16189	16189 16223 16227 16278 16362	73 263 489
G2a1-16189-16194	16189 16194 16223 16227 16278 16362	73 263 489
G2a1c	16189 16194 16195 16223 16227 16278 16362	73 263 489
G2a1c1	16189 16194C 16195 16223 16227 16278 16362	73 263 489
G2a1c2	16189 16194 16195 16223 16227 16278 16362	73 263 489
G2a1d	16189 16223 16278 16362	73 260 263 489
G2a1d1	16189 16223 16278 16362	73 260 263 489
G2a1d2	16223 16278 16362	73 260 263 489
G2a1e	16051 16223 16227 16278 16362	73 263 489
G2a1e1	16051 16150 16223 16278 16362	73 263 489
G2a-152	16223 16227 16278 16362	73 152 263 489
G2a5	16223 16227 16234 16278 16362	73 152 263 489
G2b	16223 16362	73 263 489
G2b1	16223 16362	73 263 489
G2b1a	16223 16362	73 263 489
G2b1b	16223 16269 16362	73 263 489
G2b2	16223 16362	73 263 489
G2b2a	16223 16362	73 263 489
G2b2b	16223 16260 16362	73 263 489
G3	16223 16274 16362	73 263 489
G3a	16223 16274 16362	73 263 489
G3a1'2	16223 16274 16362	73 143 263 489
G3a1	16215 16223 16274	16T 73 143 150 263 489
G3a2	16189 16223 16265C 16274 16362	73 143 152 263 489 573.1C
G3b	16223 16274 16362	73 263 489
G3b1	16223 16274 16362	73 195 263 489
G4	(16093) 16114A 16223 16362	73 191.1A 263 489
M13'46'61	16223	73 152 263 489
M13	16223	73 152 263 489
M13a	16145 16188 16189 16223	73 152 263 489
M13a1	16145 16188 16189 16223 16381	73 152 263 489
M13a1a	16145 16188 16189 16223 16311 16381	73 152 263 489
M13a1b	16145 16148 16188 16189 16223 16381	73 152 263 489
M13a2	16145 16168 16188 16189 16223 16257 16311	73 152 263 489 513
M13b	16129 16223	73 263 489
M13b1	16129 16223 16263	73 263 489
M13b2	16129 16172 16195 16223 16270	73 263 489
M13'46'61-16362	16223 16362	73 152 263 489
M46	16223 16278 16300 16343T 16362	73 146 152 263 489
M61	16223 16270 16362 16381	73 152 263 489
M14	16223	73 234 263 489
M15	16147A 16193 16223 16249 16362	64 73 183 263 489
M17	16209 16223	73 263 489
M17a	16129 16209 16223 16325	73 263 489
M17c	16209 16223	73 263 489
M19'53	16223	73 263 489
M19	16223 16249 16362	73 152 263 489 527
M53	16051 16189 16223 16316	73 240 263 390T 489 572
M53b	16051 16189 16223 16316 16399	73 240 263 390T 489 572
M21	16223	73 263 489
M21a	16129 16223 16256	73 263 489
M21c'd	16223	73 263 489
M21c	16223 16242	73 200 204 263 489
M21d	16145 16181 16223 16304	73 210 263 489
M22	16223	73 263 489
M22a	16223 16290	73 263 489
M22b	16223	73 263 489
M23'75	16223	73 263 489
M23	16223 16263 16311	73 152 195 204 263 417 489 533
M75	16068 16189 16223	73 146 150 263 489
M24'41	16223	73 263 489
M24	16223 16293C 16311	73 146 152 194 195 204 207 263 489
M41	16223 16327 16330	73 263 375 489
M41a	16189 16223 16327 16330	73 263 375 489
M41b	16223 16327 16330	73 263 375 489
M41c	16223 16327 16330	73 263 375 489
M25	16223 16304	73 263 489
M26	16214A 16223 16256 16278	73 152 263 489
M27	16223	73 263 489
M27a	16048 16077T 16136 16172 16189 16223 16311 16320	73 150 195 204 228 234 263 489 537
M27b	16145 16209 16299 16390	64 73 152 199 236 263 489
M27c	16223 16301 16304	73 146 186 263 489
M28	16148 16223 16362 16468	73 152 195 263 489
M28a	16086 16129 16148 16223 16362 16468	73 152 195 263 489
M28b	16148 16223 16362 16468	73 94 152 195 204 263 489
M29'Q	16223 16311	73 263 489
M29	16189 16223 16311	73 151 152 211 263 464 489 513
M29a	16189 16223 16311	73 151 152 211 263 310 464 489 513
M29b	16189 16223 16294 16311	73 151 152 211 263 464 489 513
Q	16129 16223 16241 16311	73 263 489
Q1'2	16129 16223 16241 16311	73 263 489
Q1	16129 16144 16148 16223 16241 16265C 16311 16343	73 89 92 146 263 489
Q1-16223!	16129 16144 16148 16241 16265C 16311 16343	73 89 92 146 263 489
Q1a	16129 16144 16148 16241 16265C 16311 16343	73 89 92 146 263 489
Q1b	16129 16144 16148 16172 16241 16265C 16311 16343	73 89 146 263 489
Q1c	16129 16144 16148 16241 16265C 16311 16343 16488	73 89 92 146 263 489
Q2	16066 16129 16223 16241	73 228T 263 489
Q2a	16066 16129 16223 16241	73 195 228T 263 489
Q2b	16066 16129 16145 16223 16286	73 152 228T 263 489
Q3	16129 16223 16241 16311	73 263 489
Q3a	16129 16223 16241 16311	73 143 263 489
Q3a-61-62	16129 16223 16241 16311	61 62 73 143 263 489
Q3a1	16129 16209 16223 16241 16311	61 62 73 143 263 489
Q3b	16129 16223 16241 16249 16311 16362	73 263 489
M31	16223	73 263 489
M31a	16223	73 263 489
M31a1	16223 16311	73 249d 263 489
M31a1a	16223 16311	73 249d 263 489
M31a1b	16223 16311	73 249d 263 489
M31a2	16093 16126 16145 16223	73 195 263 489
M31b'c	(16093) 16136 16223	73 263 489
M31b	(16093) 16136 16223	73 152 263 489
M31b1	(16093) 16136 16223	73 152 263 489
M31b2	(16093) 16136 16223	73 152 263 489
M31c	(16093) 16136 16223 16311	73 188 234 263 282 489
M32'56	16223	73 263 489
M32	16223 16319 16526	73 263 489
M32a	16223 16319 16344 16357 16526	73 195 207 263 489
M32c	16086 16148 16223 16259 16278 16319 16399 16526	73 150 200 263 489
M56	16223 16311	61 73 263 489
M33	16223	73 263 489
M33a	16223	73 263 489
M33a1	16223	73 263 489
M33a1a	16223 16294	73 195 263 489 573.1CCCCC
M33a1b	16223	73 199 263 489
M33a2	16169 16172 16223	73 263 489
M33a2a	16169 16172 16223	73 150 263 462 489
M33a-146	16223	73 146 263 489
M33a3	16223	73 146 263 489
M33-16362	16223 16362	73 263 489
M33b	16223 16324 16362	73 263 489
M33b1	16223 16259 16324 16362	73 263 489
M33c	16111 16223 16362	73 263 489
M33d	16178 16223 16288	73 152 204 207 263 489 513
M34'57	16223	73 263 489
M34	16223 16249	73 263 489 569
M34a	16223 16249 16359	73 114 263 489 569
M34b	16051 16223 16249 16250	73 263 489 569
M57	16223 16311	73 263 489
M57-152	16223 16311	73 152 263 489
M57a	16111 16223 16311	73 152 263 489
M57b	16223 16311	73 146 189 263 489
M57b1	16223 16311	73 146 189 263 489 502
M35	16223	73 263 489
M35-199	16223	73 199 263 489
M35a	16093 16223	73 199 263 482 489
M35a1	16093 16223	73 199 263 482 489
M35a1a	16093 16223 16319	73 146 199 263 482 489
M35a2	16093 16223	73 199 263 482 489
M35b	16223	73 199 263 489
M35b-16304	16223 16304	73 199 263 489
M35b1	16223 16304	73 199 204 263 489
M35b2	16223 16304	73 199 263 489
M35c	16145 16189 16223 16290 16381	73 263 489
M36	16223	73 239 263 489
M36a	16193 16223	73 152 239 263 489
M36b	16223 16325 16357	73 146 151 153 239 263 489
M36c	16223 16234 16262	73 239 263 489
M36d	16223	73 151 152 239 263 489
M36d1	16223	73 151 152 239 249d 263 489
M39'70	16223	73 263 489
M39	16223	55.1T 59-60d 65.1T (66T) 73 263 489
M39a	16223	55.1T 59-60d 65.1T (66T) 73 207 263 489
M39a1	16223	55.1T 59-60d 65.1T (66T) 73 207 263 489
M39a2	16111 16353	55.1T 59-60d 65.1T (66T) 73 207 263 489
M39b	16223	55.1T 59-60d 65.1T (66T) 73 153 263 485 489
M39b1	16223	55.1T 59-60d 65.1T (66T) 73 153 263 463 485 489
M39b2	16223	55.1T 59-60d 65.1T (66T) 73 153 263 485 489
M70	16214 16223 16297 16342 16381	73 236 263 489
M40'62	16223	73 263 489
M40	16223 16463	73 263 489
M40a	16179 16223 16294 16463	73 200 263 489
M40a1	16179 16223 16294 16319 16356 16463	73 200 263 489
M40a1a	16179 16223 16289 16294 16319 16356 16463	73 200 249 263 489
M40a1b	16179 16223 16294 16319 16356 16463	73 200 263 489
M62	16223 16295	73 150 263 489
M62a	16147 16223 16295	73 146 150 263 310 489
M62b	16223 16260 16295	73 150 263 489
M42'74	16223	73 263 489
M42	16223	73 263 489
M42a	16223 16287 16356	73 263 489
M42b	16189 16223	73 234 263 489
M42b1	16189 16223	73 93 234 263 489
M42b1a	16189 16223	73 93 143 234 263 489
M74	16223 16311 16362	73 263 489
M74a	16223 16311 16362 16381	63 64 66 73 263 489
M74b	16223 16311 16362	73 263 489
M74b1	16223 16246T 16311 16362	73 195 263 489
M44	16223 16301	73 146 263 489
M44a	16223 16301	73 146 263 489
M44a1	16223 16301	73 146 263 489
M47	16129 16166C 16189 16223 16287 16319	73 263 489
M48	16223 16225 16234 16390	73 199 263 489
M49	16223 16234	73 263 489
M49a'b	16153 16223 16234	73 263 489
M49a	16153 16223 16234	73 263 489
M49b	16153 16223 16234	73 263 489
M49c	16223 16234	73 263 489
M49d	16223 16234 16243	73 263 489
M50	16223 16263	73 263 489
M52'58	16223	73 263 489
M52	16223 16275	73 263 489
M52a	16223 16275 16327A 16390	73 263 489 573.1CCC
M52b	16223 16275	73 263 489
M58	16223 16230 16243 16270 16319 16352	73 152 263 331 489 517
M60	16223	73 263 489
M60a	16223 16284 16319	73 263 489
M60b	16093 16223 16266 16357	73 189 263 489
M71	16223 16271	73 263 489
M71a	16223 16271	73 263 489
M71a1	16223 16271	73 150 263 489
M71b	16223 16260 16264 16271	73 151 263 489
M71c	16223 16271 16362	73 143 195 204 263 489
M72	16166d 16214 16223	73 263 489
M73'79	16223 16278	73 263 489
M73	16223 16278	73 263 489
M73a	16184A 16223 16278	73 263 489
M73b	16223 16278 16354	73 199 263 489
M79	16223 16243 16260 16262 16278 16311 16319	73 151 152 263 489 499 524.1AC
M76	16189 16293C 16362	73 263 489 513
M76a	16189 16293C 16325 16362	73 146 234 263 489 513
M77	16129 16189 16213 16218 16223 16274	73 150 263 489
M80'D	16223	73 263 489
M80	16134 16189 16223 16325	73 249 263 489
D	16223 16362	73 263 489
D4	16223 16362	73 263 489
D1	16223 16325 16362	73 263 489
D1a	16223 16325 16362	73 263 489
D1a1	16189 16223 16325 16362	57G 73 489
D1a2	16223 16325 16362	73 (114) (143) 263 489
D1b	16223 16325 16362	73 263 489
D1c	16223 16325 16362	73 263 489
D1d	16223 16325 16362	73 263 489
D1e	16223 16325 16362	73 146 263 489
D1f	16142 16223 16325 16362	73 263 489
D1f1	16142 16179 16223 16295 16325 16362 16497	73 263 489
D1h	16093 16223 16274 16325 16362	73 263 489
D1i	16223 16325 16362	73 263 417 489
D4a	16129 16223 16362	73 152 263 489
D4a1	16129 16223 16362	73 152 263 489
D4a1a	16129 16223 16362	73 152 263 489
D4a1a1	16129 16223 16362	73 152 263 489
D4a1a1a	16129 16223 16362	73 152 263 489
D4a1b	16129 16223 16362	73 152 263 489
D4a1b1	16129 16223 16309 16362	73 152 263 489
D4a1c	16129 16223 16362	73 152 263 489
D4a1d	16129 16223 16286 16362	73 152 263 489
D4a1e	16129 16223 16256 16362	73 152 263 489
D4a2	16129 16223 16362	73 152 263 489
D4a2a	16129 16223 16362	73 152 263 489
D4a3	16129 16223 16249 16362	73 152 263 489
D4a3a	16129 16223 16249 16362	73 152 263 489
D4a3b	16129 16223 16249 16362	73 152 263 489
D4a3b1	16129 16223 16249 16266 16362	73 152 263 489
D4a3b2	16129 16223 16249 16311 16362	73 152 263 489
D4a-16294	16129 16223 16294 16362	73 152 263 489
D4a4	16129 16223 16294 16362	73 152 263 469G 489
D4b	16223 16362	73 263 489
D4b1	16223 16319 16362	73 263 489
D4b1a	16223 16319 16362	73 263 489
D4b1a1	16223 16319 16362	73 152 263 489
D4b1a1a	16223 16319 16362	73 152 263 489
D4b1a2	16223 16319 16362	73 263 489
D4b1a2a	16223 16319 16362	73 263 489
D4b1a2a1	16173 16223 16319 16362	73 263 489
D4b1a2a2	16223 16319 16362	73 263 489
D4b1b'd	16223 16287 16319 16362	73 263 489
D4b1b	16223 16287 16319 16362	73 263 431 489
D4b1b1	16223 16287 16319 16362	73 263 431 489
D4b1b1a	16223 16287 16319 16362 16399	73 263 431 489
D4b1b1a1	16223 16287 16319 16362 16399	73 263 431 489
D4b1b2	16223 16287 16319 16362	73 263 431 489
D4b1d	16158 16223 16284 16287 16319	73 152 263 489
D4b1c	16223 16319 16362	73 239 263 297 489
D3	16223 16319 16362	73 239 263 297 489
D4b2	16223 16362	73 263 489
D4b2a	16223 16362	73 263 489
D4b2a1	16223 16355 16362	73 263 280 489
D4b2a2	16223 16362	73 263 489
D4b2a2a	16189 16223 16362	73 263 489
D4b2a2b	16223 16362	73 263 489
D4b2b	16223 16362	73 194 263 489
D4b2b1	16223 16362	73 194 263 489
D4b2b1a	16223 16362	73 194 263 489
D4b2b1b	16223 16362	73 194 263 489
D4b2b2	16223 16362	73 194 263 489
D4b2b2a	16223 16362	73 150 194 263 489
D4b2b2b	16172 16362	73 194 263 489
D4b2b2c	16189 16223 16356 16362	73 194 263 489
D4b2b3	16223 16362	73 194 263 489
D4b2b4	16223 16362	73 150 194 263 489
D4b2b5	16223 16362	73 194 263 279 489
D4b2b6	16223 16362	73 194 263 489
D4b2d	16223 16287 16362	73 263 489
D4c	16223 16245 16362	73 263 489
D4c1	16245 16362	73 263 489
D4c1a	16245 16362	73 191.1A 194 199 207 263 489
D4c1a1	16245 16362	73 191.1A 194 199 207 263 489
D4c1b	16224 16245 16292 16362	73 263 489
D4c1b1	16223 16224 16245 16292 16362	73 146 263 489
D4c2	16223 16245 16362	73 263 489
D4c2a	16223 16245 16311 16362 16368	73 263 489
D4c2b	16223 16245 16362	73 263 489 534
D4c2c	16223 16245 16362	73 263 489
D4d	16223 16319 16362	73 263 489
D4e	16223 16362	73 263 489
D4e1'3	16223 16362	73 263 489
D4e1	(16092) 16223 16362	73 263 489
D4e1a	(16092) 16223 16362	73 94 263 489
D4e1a1	(16092) 16093 16176 16223 16362	73 94 194 263 489
D4e1a2	(16092) 16223 16362	73 94 214 263 489
D4e1a2a	(16092) 16223 16362	73 94 214 263 334 489
D4e1c	(16092) 16223 16362	73 263 489
D2	(16092) 16129 16223 16362	73 263 489
D2a'b	(16092) 16129 16223 16271 16362	73 263 489
D2a	(16092) 16129 16223 16271 16362	73 263 489
D2a1	(16092) 16129 16223 16271 16362	73 263 489
D2a1a	(16092) 16129 16223 16271 16362	73 263 489
D2a1b	(16092) 16111 16129 16223 16271 16362 16366	73 263 489
D2a2	(16092) 16129 16223 16271 16362	73 263 489
D2b	(16092) 16129 16223 16271 16362	73 195 263 489
D2b1	(16092) 16129 16223 16271 16362	73 195 263 489
D2b1a	(16092) 16129 16223 16271 16362	73 195 263 489
D2b2	(16092) 16129 16223 16271 16362	73 195 263 489
D2c	(16092) 16129 16223 16362	73 263 310 489
D4e3	16223 16362	73 263 489
D4e2	16223 16362	73 263 489
D4e2a	16223 16362	73 263 489 573.1C
D4e2b	16223 16362	73 263 489
D4e2c	16223 16362	73 263 489
D4e4	16223 16362	73 263 489
D4e4a	16223 16362	73 263 489
D4e4a1	16189 16223 16362	73 263 310 453A 489
D4e4b	16223 16362	73 263 489
D4e5	16223 16274 16362	73 263 489
D4e5a	16223 16274 16362	73 152 263 489 573.1CC
D4e5b	16223 16274 16291 16362	73 263 489
D4f	16223 16362	73 263 489
D4f1	16223 16362	73 263 489
D4g	16223 16362	73 263 489
D4g1	16223 16278 16362	73 263 489 573.1C
D4g1a	16223 16278 16362	73 263 489 573.1C
D4g1b	16223 16278 16362	73 263 489 573.1C
D4g1c	16223 16278 16362	73 263 489 573.1C
D4g2	16223 16362	73 263 298 489
D4g2a	16223 16274 16362	73 263 298 489
D4g2a1	16223 16274 16362	73 263 298 489
D4g2a1a	16274 16362	73 195 263 298 489 546
D4g2b	16223 16362	73 263 298 489
D4g2b1	16223 16362	73 (195) (263) 298 489
D4h	16223 16362	73 263 489
D4h1	16174 16223 16362	73 263 489
D4h1a	16174 16223 16362	73 146 183 263 489
D4h1a1	16174 16223 16362 16497	73 146 183 263 489
D4h1a2	16174 16223 16362	73 146 183 263 489
D4h1b	16174 16223 16362	73 263 489
D4h2	16223 16278 16325 16362	73 263 489
D4h3	16223 16301 16342 16362	73 152 263 489
D4h3a	16223 16241 16301 16342 16362	73 152 263 489
D4h3a1	16223 16241 16301 16342 16362	73 152 263 489
D4h3a1a	16223 16241 16301 16342 16362	73 152 263 489
D4h3a1a1	16223 16241 16301 16342 16362	73 146 152 263 489
D4h3a1a2	16223 16241 16301 16342 16362	73 152 263 489
D4h3a2	16223 16241 16301 16342 16362	73 152 263 489 573.1C
D4h3a3	16223 16241 16301 16342 16362	71d 73 152 263 489
D4h3a3a	16223 16241 16301 16342 16362	71d 73 152 263 489 533
D4h3a4	16223 16241 16294 16301 16342 16362	73 152 263 489
D4h3a5	16223 16241 16342 16362	73 152 263 489
D4h3b	16148 16223 16249 16301 16342 16362	73 152 263 489
D4h4	16223 16362	73 263 489
D4h4a	16223 16311 16362	73 152 263 489
D4i	16223 16294 16362	73 263 489
D4i1	16223 16263 16294 16362	73 263 489
D4i2	16223 16294 16362	73 263 489
D4j	16223 16362	73 263 489
D4j1	16223 16362	73 263 489
D4j1a	16086 16223 16362	73 263 489
D4j1a1	16086 16223 16362	73 263 489
D4j1b	16223 16362	73 263 489
D4j1b2	16223 16362	73 185 263 489
D4j2	16223 16291 16362	73 152 263 489
D4j2a	16223 16291 16362	73 152 263 489
D4j-16311	16223 16311 16362	73 263 489
D4j3	16184 16223 16311 16362	73 263 489
D4j3a	16184 16223 16311 16362	73 263 489
D4j3a1	16184 16223 16311 16362 16525	73 263 489
D4j11	16223 16311 16362	73 263 489
D4j4	16223 16362	73 263 489
D4j4a	16223 16263 16362	73 263 489
D4j5	16223 16362	73 263 489
D4j6	16223 16362	73 146 263 489
D4j7	16082 16223 16362	73 263 489
D4j7a	16082 16223 16362	73 263 489
D4j8	16174 16223 16362	73 263 489
D4j9	16223 16362	73 263 489
D4j10	16223 16362	73 263 489
D4-195	16223 16362	73 195 263 489
D4k	16223	73 195 263 489
D4o	16223 16290 16362	73 195 263 489
D4o1	16183 16223 16274 16290 16319 16362	73 195 263 489
D4o1a	16183 16223 16274 16290 16319 16362	73 195 263 489
D4o2	16093 16223 16290 16362	73 195 263 489
D4p	16223 16362	73 195 198 263 489
D4l	16223 16362 16368	73 263 489
D4l1	16223 16362 16368	73 263 489
D4l1a	16223 16362 16368	73 263 489
D4l2	16223 16362 16368	73 127 263 489
D4m	16223 16362	73 263 489
D4m1	16244 16362	73 263 489
D4m2	16042 16223 16362	73 263 489
D4n	16223 16355A 16362	73 263 489
D4n1	16223 16355A 16362	73 263 489
D4n1a	16223 16355A 16362	73 263 489
D4q	16223 16256 16311 16362	73 200 263 489
D4q1	16140 16223 16256 16311 16362	73 200 263 489
D4q1a	16140 16223 16256 16311 16362	73 200 263 489
D4s	16223 16362	73 199 263 489
D-16189	16189 16223 16362	73 263 489
D5	16189 16223 16362	73 150 263 489
D5a'b	16189 16223 16362	73 150 263 489
D5a	16189 16223 16362	73 150 263 489
D5a1	16189 16223 16362 16390	68 73 150 263 309d 489
D5a1a	16189 16223 16362 16390	68 73 150 263 309d 489
D5a1a1	16189 16223 16362 16390	68 73 150 263 309d 489
D5a1a2	16189 16223 16362 16390	68 73 150 263 309d 489
D5a2	16172 16189 16223 16362	73 150 263 489
D5a2a	16172 16189 16223 16266 16362	73 150 263 489
D5a2a-16092	16092 16172 16189 16223 16266 16362	73 150 263 489
D5a2a1	16092 16164 16172 16189 16223 16266 16362	73 150 263 489
D5a2a1-16172!	16092 16164 16189 16223 16266 16362	73 150 263 489
D5a2a1a	16092 16164 16189 16223 16266 16362	44.1C 73 150 263 489
D5a2a1a1	16092 16102 16164 16189 16223 16266 16362	44.1C 73 150 263 489
D5a2a1a2	16092 16164 16189 16223 16266 16362	44.1C 73 150 263 489
D5a2a1b	16092 16164 16172 16189 16223 16266 16362	73 150 263 489
D5a2a2	16092 16172 16189 16223 16266 16362	73 150 263 489
D5a3	16189 16223 16360 16362	73 150 263 489
D5a3a	16189 16223 16360 16362	73 150 263 489
D5b	16189 16223 16362	73 150 263 456 489
D5b1	16189 16223 16362	73 150 263 456 489
D5b1a	16189 16223 16362	73 150 263 456 489
D5b1a1	16167 16189 16223 16362	73 150 263 456 489
D5b1b	16189 16223 16362	73 150 263 456 489
D5b1b1	16189 16216 16223 16362	73 150 263 456 489
D5b1c	16189 16223 16362	73 150 263 456 489
D5b1d	16189 16223 16362	73 146 150 263 456 489
D5b2	16176 16189 16223 16292G 16300 16362	73 150 263 281 456 489
D5c	16189 16190 16223 16362	73 150 151 152 263 489
D5c1	16189 16190 16223 16362 16390	73 146 150 151 152 263 489
D5c-16311	16189 16190 16223 16311 16362	73 150 151 152 263 489
D5c2	16189 16190 16223 16311 16316 16362	73 150 151 152 263 489
D6	16189 16223 16362	73 263 489
D6a	16189 16223 16274 16362	73 263 489
D6a1	16189 16223 16274 16362	73 263 489
D6c	16189 16223 16311 16362	73 152 263 489
N	16223	73 263
N1'5	16223	73 263
N1	16223	73 263
N1a'c'd'e'I	16223	73 204 263
N1a'd'e'I	16223	73 199 204 263
N1a'e'I	16223	73 199 204 263 573.1C
N1a	16147G 16172 16223 16248 16355	73 152 199 204 263 573.1C
N1a1	16147A 16172 16223 16248 16355	73 152 199 204 263 573.1C
N1a1a	16147A 16172 16223 16248 16320 16355	73 152 199 204 263 573.1C
N1a1a1	16147A 16172 16223 16248 16320 16355	73 152 199 204 263 573.1C
N1a1a1a	16147A 16172 16189 16223 16248 16320 16355	73 152 199 204 263 573.1C
N1a1a2	16147A 16223 16248 16320 16355	73 152 199 204 207 263 573.1C
N1a1a3	16147A 16154 16172 16223 16248 16320 16355	73 152 199 204 263 573.1C
N1a1b	16093 16147A 16172 16223 16248 16355	73 199 204 263 573.1C
N1e'I	16223	73 199 204 250 263 573.1C
I	16129 16223 16391	73 199 204 250 263 573.1C
I1	16129 16223 16311 16391	73 199 204 250 263 455.1T 573.1C
I1a	16129 16172 16223 16311 16391	73 199 204 250 263 455.1T 573.1C
I1a1	16129 16172 16223 16311 16391	73 199 203 204 250 263 455.1T 573.1C
I1a1a	16129 16172 16223 16311 16391	73 199 203 204 250 263 573.1C
I1b	16129 16223 16311 16391	73 199 204 250 263 455.1T 573.1C
I2'3	16129 16223 16391	73 152 199 204 207 250 263 573.1C
I2	16129 16223 16391	73 152 199 204 207 250 263 573.1C
I2a	16129 16145 16223 16391	73 152 199 204 207 250 263 573.1C
I2a1	16129 16145 16223 16391	73 152 199 204 207 250 263 573.1C
I2b	16129 16166C 16223 16391	73 152 199 204 207 250 263 573.1C
I3	16129 16223 16391	73 152 199 204 207 239 250 263 524.1ACAC 573.1C
I4	16129 16223 16391	73 199 204 250 263 573.1C
I5	16129 16223 16391	73 199 204 250 263 573.1C
I5a	16129 16148 16223 16391	73 199 204 250 263 573.1C
I5a1	16129 16148 16223 16391	73 199 204 250 263 573.1C
I6	16129 16223 16391	73 199 204 250 263 573.1C
N1e	16223 16274 16295 16309 16319 16482	73 114 143 199 250 263 573.1C
N1d	16223 16274 16301 16356	73 199 204 263
N1c	16201 16223 16265	73 189 195 204 210 263
N1b	16145 16176G 16223 16390	73 152 263
N1b1	16145 16176G 16223 16390	73 152 263
N1b1a	16145 16176G 16223 16390	73 152 263 455.1T
N1b1b	16145 16176G 16223 16390	73 152 263
N1b1c	16145 16176G 16223 16390	73 152 263
N1b1-16129	16129 16145 16176G 16223 16390	73 152 263
N1b1d	16129 16145 16176G 16223 16390	73 152 185 188 263
N1b2	16145 16176A 16223 16390	73 152 263
N5	16111 16223 16311	73 263
N5a	16111 16144 16185 16223 16261 16311 16319	73 131 199 228 234 263 374
N2	16223	73 189 263
N2a	16153 16223 16319	73 189 199 263
W	16223 16292	73 189 195 204 207 263
W1	16223 16292	73 189 195 204 207 263
W1a	16223 16292	73 189 195 204 207 263
W1b	16223 16292	73 189 195 204 207 227 263
W1b1	16223 16292	73 189 195 204 207 227 263
W1-119	16223 16292	73 119 189 195 204 207 263
W1c	16223 16292	73 119 189 195 204 207 263
W1d	16223 16260 16298	73 194 195 200 204 207 263 524.1AC
W1e	16223 16292 16295	73 189 195 204 207 263
W1f	16223 16292	73 189 195 204 207 263
W-194	16223 16292	73 189 194 195 204 207 263
W3	16223 16292	73 189 194 195 204 207 263
W3a	16223 16292	73 189 194 195 204 207 263
W3a1	16223 16292	73 189 194 195 204 207 263
W3a1a	16223 16292	73 189 194 195 204 207 263
W3a1b	16223 16292	73 189 194 195 204 207 263
W3b	16223 16292	73 189 194 195 199 204 207 263
W4	16223 16292	73 143 189 194 195 196 204 207 263
W4a	16223 16286 16292	73 143 189 194 195 196 204 207 263
W5	16223 16292	73 189 194 195 204 207 263
W5a	16223 16292 16362	73 189 194 195 204 207 263
W5a1	16223 16292 16362	73 189 194 195 204 207 263
W5a1a	16223 16292 16362	73 189 194 195 204 207 263
W5a1a1	16223 16292 16362	73 189 194 195 204 207 263
W5a1a1a	16223 16292 16362	57 60.1T 73 139 189 194 195 204 207 263
W5a2	16223 16292 16362	73 150 189 194 195 204 207 263
W6	16223 16292 16325	73 189 194 195 204 207 263
N8	16223 16263 16274 16311 16343 16357	73 103 151 152 260 263
N9	16223	73 263
N9a	16223 16257A 16261	73 150 263
N9a1'3	16129 16223 16257A 16261	73 150 263
N9a1	16111 16129 16223 16257A 16261	73 150 263
N9a1a	16111 16129 16223 16257A 16261	73 150 263
N9a3	16129 16223 16257A 16261	73 150 263
N9a2'4'5	16172 16223 16257A 16261	73 150 263
N9a2	16172 16223 16257A 16261	73 150 263
N9a2a	16172 16223 16257A 16261 16497	73 150 263
N9a2a1	16172 16223 16257A 16261 16304 16497	73 150 263
N9a2a2	16172 16223 16257A 16261 16497	73 150 263
N9a2a3	16172 16223 16257A 16261 16497	73 150 263
N9a2c	16172 16223 16250 16257A 16261	73 150 263
N9a2d	16172 16223 16257A 16261	73 150 263
N9a4	16145 16172 16223 16245 16257A 16261	73 150 263
N9a4a	16145 16172 16223 16245 16257A 16261	73 150 263
N9a4b	16092 16145 16172 16223 16245 16257A 16261	73 150 263
N9a5	16172 16189 16209 16223 16257A 16261	73 150 263
N9a6	16223 16257A 16261 16292	73 150 263
N9a6a	16136 16223 16257A 16261 16292 16294	73 150 207 263
N9a7	16223 16257A 16261 16291	73 150 263
N9a8	16223 16257A 16261	73 150 263
N9a9	16223 16257A 16261	73 150 263
N9a10	16223 16257A 16261	73 150 263
N9a10a	16223 16257A	73 150 263
N9b	16189 16223	73 263
N9b1	16189 16223	73 263
N9b1a	16189 16223	73 263
N9b1b	16129 16189 16223 16390	73 263
N9b1c	16189 16223	73 94 263
N9b1c1	16189 16223	73 94 207 263
N9b2	16189 16223 16294	73 263
N9b3	16189 16223	73 263
Y	16126 16231	73 263
Y1	16126 16231 16266	73 146 263
Y1a	16126 16189 16231 16266	73 146 263
Y1b	16126 16231 16266	73 146 263
Y2	16126 16231 16311	73 263 482
Y2a	16126 16231 16311	73 263 482
Y2a1	16126 16231 16311	73 263 482
Y2b	16126 16231 16311	73 263 338 482
N10	16172 16223 16362	73 263
N10a	16172 16189 16223 16362	73 185 189 263
N10b	16069 16172 16223 16278 16291A 16298 16362	73 150 152 199 263
N11	16223	73 263
N11a	16223 16355	73 195 263
N11a1	16189 16223 16355	73 195 263
N11b	16129 16193 16209 16223 16270 16291	73 150 261 263
N13	16066 16223 16261 16290	73 146 152 178 195 263
N14	16223	73 263
N21	16193 16223	73 150 263 337d
N22	16168 16223 16249	73 150 263
A	16223 16290 16319	73 235 263
A-152	16223 16290 16319	73 152 235 263
A3	16223 16290 16319	73 152 235 263
A4	16223 16290 16319 16362	73 152 235 263
A4a	16223 16290 16319 16362	73 152 235 263
A4a1	16223 16249 16290 16319 16362	73 152 235 263
A4a1a	16223 16249 16290 16319 16362	73 152 235 263
A4b	16189 16223 16290 16319 16362	73 152 235 263
A4-200	16223 16290 16319 16362	73 152 200 235 263
A4c	16223 16290 16319 16362	73 152 200 235 263
A4d	16223 16290 16319 16362	73 151 152 200 235 263
A4e	16223 16290 16319 16362	73 152 235
A4e1	16223 16290 16319 16362	73 152 207 235
A4f	16223 16290 16292A 16319 16362	73 152 235 263 298A
A2	16111 16223 16290 16319 16362	73 146 153 235 263
A2a	16111 16223 16290 16319 16362	73 146 153 235 263
A2a2	16111 16223 16290 16319 16362	73 146 153 235 263
A2b	16111 16223 16290 16319 16362	73 146 153 235 263
A2b1	16111 16223 16265 16290 16319 16362	73 146 153 235 263
A2-64	16111 16223 16290 16319 16362	64 73 146 153 235 263
A2c	16111 16223 (16235) 16290 16319 16362	64 73 146 (152) 153 235 263
A2d	16111 16223 16290 16319 16362	64 73 146 153 235 263
A2d1	16111 16223 16290 16319 16362	64 73 146 153 235 263
A2d1a	16111 16223 16274 16290 16319 16362	64 73 146 153 235 263
A2d2	16111 16223 16290 16319 16362	64 73 146 153 235 263
A2e	16111 16189 16223 16290 16319 16336 16362	64 73 146 235 263
A2f	16111 16223 16290 16319 16362	64 73 146 153 235 263
A2f1	16111 (16192) 16223 16290 16319 16362	64 73 146 153 235 263
A2f1a	16111 (16192) 16223 16290 16319 16362	64 73 146 153 235 263
A2f2	16111 16223 16290 16319 16357 16362	64 73 153 235 263
A2f3	16111 16223 16290 16319 16362	64 73 146 151 153 235 263
A2g	16111 16223 16290 16319 16362 16391	64 73 146 153 235 263
A2g1	16111 16223 16290 16319 16362 16391	64 73 146 153 235 263
A2h	16111 16223 16290 16319 16362 16526	64 73 146 153 235 263
A2h1	16111 16223 16290 16319 16335 16362 16526	64 73 146 153 235 263
A2i	16111 16223 16290 16319 16325 16362	64 73 94 146 153 235 263
A2j	16111 16223 16290 16319 16362	64 73 146 153 235 263
A2j1	16111 16223 16290 16319 16362	64 73 146 153 235 263
A2k	16111 16223 16290 16319 16362	64 73 146 153 235 263
A2k1	16111 16223 16290 16319 16362	64 73 146 153 235 263
A2-64-16111!	16223 16290 16319 16362	64 73 146 153 235 263
A2l	16223 16290 16319 16362	64 73 146 153 235 263
A2m	16223 16240 16290 16319 16362	64 73 146 153 235 263
A2n	16223 16290 16319 16362	64 73 146 153 235 263
A2o	16223 16290 16319 16362	64 73 146 153 235 263
A2p	16111 16129 16223 16290 16319 16362	64 73 146 153 235 263
A2p1	16111 16129 16223 16290 16319 16362	64 73 146 153 235 263
A2r	16111 16223 16290 16319 16362	64 73 146 153 235 263
A2s	16111 16223 16290 16319 16362	64 73 146 153 235 263
A2t	16111 16223 16290 16319 16362	64 73 146 153 235 263
A2u	16111 16136 16223 16290 16319 16362	64 73 146 153 235 263
A2u1	16111 16136 16223 16257 16290 16319 16344 16362	64 73 146 153 235 263
A2v	16111 16223 16239 16290 16319 16362	64 73 146 153 235 263
A2w	16111 16223 16290 16319 16362	64 73 146 153 235 263
A2x	16111 16223 16290 16319 16362	64 73 146 153 235 263
A2q	16111 16209 16223 16290 16319 16362	73 146 153 235 263
A6	16223 16290 16319 16362	73 152 235 263
A7	16051 16129 16189 16223 16290 16319	73 146 152 235 263
A9	16223 16290 16319	73 152 235 263
A11	16223 16290 16293C 16319	73 152 235 263
A11a	16223 16290 16293C 16319	73 152 235 263
A11-16234	16223 16234 16290 16293C 16319	73 152 235 263
A11b	16223 16234 16290 16293C 16319 16527	73 152 235 263
A5	16223 16290 16319	73 235 263
A5a	16187 16223 16290 16319	73 235 263
A5a1	16187 16223 16290 16319	73 235 263
A5a1a	16187 16223 16290 16319	73 235 263
A5a1a1	16187 16223 16290 16319	73 235 263
A5a1a1a	16187 16223 16290 16319	73 235 263
A5a1a1b	16187 16223 16290 16319	73 235 263
A5a1a2	16187 16223 16290 16319	73 235 263
A5a1b	16160 16187 16223 16290 16319	73 235 263
A5a2	16187 16223 16290 16319	73 235 263
A5a3	16187 16223 16290 16319	73 235 263
A5b	16126 16223 (16235) 16290 16319	73 235 263
A5b1	16126 16223 (16235) 16290 16319	73 235 263
A5c	16129 16213 16223 16290 16319	73 152 235 263
A8	16223 16242 16290 16319	73 235 263
A10	16223 16227C 16290 16311 16319	73 235 263
O	16213 16223	73 263
O1	16213 16223 16303 16362	73 152 263 509
O1a	16213 16223 16303 16362	73 152 263 509
S	16223	73 263
S1	16075 16223	73 263
S2	16223	73 263
S-152	16223	73 152 263
S3	16140 16187 16189 16223 16287 16311	63 64 66 73 151 152 195 263
S4	16172 16192 16223 16319	73 152 263
S5	16223 16243 16256	73 152 234 249d 263 508
X	16189 16223 16278	73 263
X1'2'3	16189 16223 16278	73 153 263
X1'3	16189 16223 16278	73 146 153 263
X1	(16104) 16189 16223	73 146 153 263
X1a	(16104) 16189 16223	73 146 153 263
X1c	(16104) 16189 16223	73 146 153 263
X3	16189 16223 16278	73 146 153 263
X3a	16126 16189 16223 16278	73 146 153 256 263
X2	16189 16223 16278	73 153 195 263
X2-225	16189 16223 16278	73 153 195 225 263
X2a'j	16189 16223 16278	73 153 195 225 263
X2a	16189 16213 16223 16278	73 153 195 200 225 263
X2a1	16093 16189 16213 16223 16278	73 143 153 195 200 263
X2a1a	16093 16189 16213 16223 16278 16357	73 143 153 195 200 263
X2a1a1	16189 16213 16223 16278 16319 16357	73 143 195 200 204 263
X2a1b	16093 16189 16213 16223 16278	73 143 153 195 200 263
X2a1b1	16093 16189 16213 16223 16278	73 143 153 195 200 263
X2a1b1a	16093 16189 16213 16223 16278	73 143 153 195 200 263
X2a1c	16093 16104 16147 16189 16213 16223 16278	73 143 153 195 200 263
X2a2	16189 16213 16223 16254C 16278	73 153 195 200 225 263
X2j	16179 16189 16223 16278 16357	44.1C 73 153 195 225 263
X2b'd	16189 16223 16278	73 153 195 225 263
X2b	16189 16223 16278	73 153 195 225 263
X2b-226	16189 16223 16278	73 153 195 225 226 263
X2b1	16189 16223 16248 16278	73 153 195 225 226 263
X2b2	16189 16223 16278	73 153 195 225 226 263
X2b3	16189 16223 16278	73 153 195 225 226 263
X2b4	16189 16223 16278	73 153 195 225 226 263
X2b4a	16189 16223 16278	73 153 195 225 226 263
X2d	16189 16223 16278	73 195 263
X2c	16189 16223 16255 16278	73 153 195 225 227 263
X2c1	16189 16223 16255 16278	73 153 195 225 227 263
X2c1a	16108 16189 16223 16255 16278	73 153 195 225 227 263
X2-225-153!	16189 16223 16278	73 195 225 263
X2g	16189 16223 16278	73 195 225 263
X2e	16189 16223 16278	73 153 195 225 263
X2e1	16189A 16223 16278	73 153 195 225 263
X2e2	16189 16223 16278	73 153 195 225 263
X2h	16189 16278	73 153 195 225 263
X2f	16189 16223 16278	73 153 195 257 263
X4	16189 16223 16266 16274 16278 16390	73 152 195 263
R	rCRS	73 263
R0	rCRS	263
R0a'b	16362	(58) 64 263
R0a	16126 16362	(58) 64 263
R0a1	16126 16362	(58) 64 263
R0a1a	16126 16355 16362	(58) 64 146 263
R0a1a1	16126 16355 16362	(58) 64 146 263
R0a1a1a	16126 16172 16355 16362	(58) 64 146 263
R0a1a2	16126 16355 16362	(58) 64 93 95C 146 263
R0a1a3	16126 16355 16362	(58) 64 146 263
R0a1a4	16126 16355 16362	(58) 64 146 263
R0a1-152	16126 16362	(58) 64 152 263
R0a1b	16093 16126 16189 16362	26 (58) 64 152 263
R0a-60.1T	16126 16362	(58) 60.1T 64 263
R0a2'3	16126 16362	(58) 60.1T 64 263
R0a2	16126 16362	(58) 60.1T 64 263
R0a2a	16126 16362	(58) 60.1T 64 263
R0a2b	16126 16305T 16362	(58) 60.1T 64 263
R0a2c	16126 16304 16362	(58) 60.1T 64 263
R0a2d	16126 16362	(58) 60.1T 64 263
R0a2e	16126 16362	(58) 60.1T 64 263
R0a2f	16126 16362	(58) 60.1T 64 263
R0a2f1	16126 16362	(58) 60.1T 64 131 263
R0a2f1a	16126 16362	(58) 60.1T 64 131 263
R0a2f1b	16126 16207 16362	(58) 60.1T 64 131 263
R0a2g	16126 16362	(58) 60.1T 64 263
R0a2h	16126 16172 16184A 16362	(58) 60.1T 64 263
R0a2i	16092 16126 (16278) 16362	(58) 60.1T 64 263
R0a2-195	16126 16362	(58) 60.1T 64 195 263
R0a2j	16126 16362	(58) 60.1T 64 195 263
R0a2k	16126 16362	(58) 60.1T 64 263
R0a2k1	16114 16126 16325 16362	(58) 60.1T 64 263
R0a2l	16126 16362	(58) 60.1T 64 263
R0a3	16126 16362	(58) 60.1T 64 263
R0b	16301 16362	(58) 64 93 152 263
HV	rCRS	263
HV0	16298	72 263
HV0a	16298	72 263
HV0a1	16126 16298	72 263
V	16298	72 263
V1	16298	72 263
V1a	16298	72 263
V1a1	16183 16298	72 227 263 485
V1a2	16298	72 263
V2	16298	72 263
V2a	16298	72 263
V2a1	16298	72 263
V2a1a	16298	72 263
V2b	16298	72 263
V2b1	16298	72 263
V3	16298	72 263
V4	16298	72 263
V5	16203 16298	72 263
V6	16162 16298	72 263
V7	16298	72 263
V7a	16153 16298	72 93 263
V8	16298	72 263
V9	16298	72 204 207 263
V9a	rCRS	72 204 207 263
V9a1	16192 16219	72 204 207 263
V10	(16261) 16298	72 263
HV0-195	16298	72 195 263
HV0b	16298	72 195 198 263
HV0c	16298	72 195 263
HV1	16067	263
HV1a'b'c	16067	263
HV1a	16067	263
HV1a1	16067 16355	150 263
HV1a1a	16067 16355	150 263
HV1a1b	16067 16355	150 263
HV1a2	16067	263
HV1a2a	16067	263
HV1a3	16067 16327A	263
HV1b	16067	263
HV1b1	16067 16274	263
HV1b1a	16067 16274	263
HV1b1b	16067 16274	263
HV1b-152	16067	152 263
HV1b2	16067 16189	152 263
HV1c	16067 16172	182 263
HV1d	16067 16278 16362	146 249d 263
HV-73	rCRS	73 263
HV2	16217	73 195 263
HV2a	16214 16217 16335	73 195 246 263 573.1CCC
HV4	rCRS	263
HV4a	16221	263
HV4a1	16221	263
HV4a1a	16221 16291	263
HV4a2	16129 16221	263
HV4a2a	16129 16287 16311	263
HV4b	16069	263
HV4c	rCRS	263
HV5	rCRS	263
HV-16311	16311	263
HV6	16172 16311	263
HV6a	16113C 16172 16311	263
HV7	16311	263
HV8	16311 16354	263
HV9	16311	263
HV9-152	16311	152 263
HV9a	16311	131 152 263
HV10	16311	263
HV11	16311	263
HV14	16311	263 480
HV12	rCRS	263
HV12a	16220C 16292	263
HV12b	rCRS	150 263
HV13	16357	263
H	rCRS	263
H1	rCRS	263
H1a	16162	73 263
H1a1	16162 16209	73 263
H1a2	16162	73 263
H1a3	16051 16162	73 263
H1-16189	16189	263
H1b	16189 16356 16362	263
H1f	16093 16189	263
H1g	16189	263
H1k	16189 16290	263
H1q	16189	263
H1c	rCRS	263 477
H1c1	16263	263 477
H1c2	rCRS	263 477
H1c3	rCRS	257 263 477
H1e	rCRS	263
H1e1	rCRS	263
H1e1a	rCRS	263
H1e2	rCRS	263
H1h	rCRS	(146) 263
H1i	rCRS	263
H1j	rCRS	263
H1j-16129	16129	263
H1j1	16129	263
H1m	rCRS	263
H1n	rCRS	146 263
H1o	rCRS	263 267 485
H1p	rCRS	263
H1r	rCRS	263
H1s	rCRS	263
H1t	rCRS	263
H1t1	rCRS	263
H1t2	rCRS	263
H1u	rCRS	263
H1v	rCRS	263
H1v1	rCRS	263
H1v1a	rCRS	263
H1v1b	rCRS	263
H1w	rCRS	263
H1x	16037 16256	263
H2	rCRS	263
H2a	rCRS	263
H2a1	16354	263
H2a1a	16354	263
H2a2	rCRS	263
H2a2a	rCRS	rCRS
H2a2b	16291	263
H2a2b1	16235 16291	263
H2a3	16274	263
H2a4	rCRS	263
H2a5	rCRS	263
H2a5a	16291	263
H2a5a1	16291	263
H2a5a2	16291	263
H2a5b	(16183)	263
H2b	16311	152 263
H3	rCRS	263
H3a	(16239G)	(152) 263
H3b	rCRS	263
H3c	rCRS	263
H3d	rCRS	73 263
H3e	rCRS	263
H3f	rCRS	93 263
H3g	rCRS	(152) 263
H3h	16311	263
H4	rCRS	263
H4a	rCRS	263
H4a1	rCRS	263
H4a1a	rCRS	263
H4a1a1	rCRS	73 263
H4a1a1a	rCRS	73 263
H4a1b	rCRS	195 263 513
H4a2	rCRS	263
H4b	rCRS	263
H5'36	rCRS	263 456
H5	16304	263 456
H5a	16304	263 456
H5a1	16304	263 456
H5a2	(16093) 16304	(200) 263 456
H5b	16304	263 456
H36	16070	152 263 456
H36a	16070	152 263 456
H-16362	16362	263
H6	16362 16482	239 263
H6a	16362 16482	239 263
H6a1	16362 16482	239 263
H6a1a	16362 16482	239 263
H6a1a1	16362 16482	239 263
H6a1a1a	(16311) 16362 16482	239 263
H6a1b	16362 16482	239 263
H6a1b1	16284 16362 16482	239 263
H6a1b2	16362 16482	239 263
H6b	16300 16362 16482	239 263
H8	16288 16362	146 195 263
H7	rCRS	263
H7a	rCRS	263
H7a1	16261	263
H7b	rCRS	263
H7b1	rCRS	263
H7c	rCRS	263
H7c1	16265	263
H9	rCRS	152 263
H9a	(16168)	152 263
H10	rCRS	263
H10a	rCRS	263
H10a1	16114	263
H-195	rCRS	195 263
H11	16311	195 263
H11a	16311	195 263
H11a1	(16278) 16311	195 263
H11a2	16092 16140 (16293) 16311	195 263
H12	rCRS	195 263
H13	rCRS	263
H13a	rCRS	263
H13a1	rCRS	263
H13a1a	rCRS	263
H13a1a1	rCRS	263
H13a1a1a	rCRS	263
H13a1a2	rCRS	263
H13a2	rCRS	263
H13a2a	rCRS	263
H13a2a1	rCRS	183 263 524.1AC
H13a2b	rCRS	263
H13a2b1	16311	263
H13b	rCRS	263
H14	rCRS	263
H14a	16256 16352	263
H14a1	16256 16352	146 263
H15	rCRS	55 57 263
H15a	rCRS	55 57 263
H15a1	rCRS	55 (57G) 263
H15b	rCRS	55 57 263
H16	rCRS	263
H16-152	rCRS	152 263
H16a	rCRS	152 263
H16b	rCRS	263
H-16129	16129	263
H17	16129	263
H17a	16129	263
H27	16093 16129 16316	263
H18	rCRS	263
H19	rCRS	263
H20	16218	263
H20a	16218 16328A 16362	249d 263 292
H-16192	16192	263
H21	16192	186 263
H30	16192	195 263 504
H22	16145 16227	263
H23	rCRS	263
H24	(16293)	263
H25	rCRS	263
H26	rCRS	263
H28	rCRS	186A 263
H29	rCRS	93 263 573.1CC
H31	rCRS	146 195 263
H32	rCRS	73 152 263
H33	rCRS	263
H34	16291	263
H35	rCRS	263
H37	rCRS	263
H38	rCRS	235 263
H39	16299	263
R1	16311	73 263 295A
R1a	16311	73 263 295A
R1a1	16311	73 263 295A
R1a1a	16311	73 263 295A
R1a1a1	16311	73 263 295A
R2'JT	rCRS	73 263
R2	16071	73 152 263
JT	16126	73 263
J	16069 16126	73 263 295 489
J1	16069 16126	73 263 295 462 489
J1b	16069 16126 16145 (16222) 16261	73 263 295 462 489
J1b1	16069 16126 16145 (16222) 16261	73 263 295 462 489
J1b1a	16069 16126 16145 (16222) 16261	73 242 263 295 462 489
J1b1a1	16069 16126 16145 16172 (16222) 16261	73 242 263 295 462 489
J1b1a1a	16069 16126 16145 16172 16192 (16222) 16261	73 242 263 295 462 489
J1b1a1b	16069 16126 16145 16172 (16222) 16261	73 242 263 295 462 489
J1b1b	16069 16126 16145 (16222) 16261	73 263 271 295 462 489
J1b1b1	16069 16126 16145 (16222) 16261	73 263 271 295 462 489
J1b2	16069 16126 16145 (16222) 16261	73 263 295 462 489
J1b3	16069 16126 16145 (16222) 16261	73 263 295 462 489
J1b3a	16069 16126 16145 (16222) 16235 16261 16271	73 263 295 462 489
J1b4	16069 16126 16145 (16222) 16261 16287	73 263 295 462 489
J1c	16069 16126	73 (185) (228) 263 295 462 489
J1c1	16069 16126	73 (185) (228) 263 295 462 482 489
J1c1a	16069 16126	73 (228) 263 295 462 482 489
J1c1b	16069 16126	73 (185) (228) 263 295 462 482 489
J1c1b1	16069 16126	73 (185) (228) 263 295 462 482 489
J1c1b1a	16069 16126	73 (185) (228) 263 295 462 482 489
J1c2	16069 16126	73 (185) 188 (228) 263 295 462 489
J1c2a	16069 16126	73 (185) 188 (228) 263 295 462 489
J1c2a1	16069 16126	73 (185) 188 (228) 263 295 462 489
J1c2b	16069 16126	73 (185) 188 (228) 263 295 462 489
J1c2c	16069 16126	73 (146) (185) 188 (228) 263 295 462 489
J1c2c1	16069 16126	73 (146) (185) 188 222 (228) 263 295 462 489
J1c2c2	16069 16126	73 (146) (185) 188 (228) 263 295 462 489
J1c2c2a	16069 16126	73 (146) (185) 188 (228) 263 295 462 489
J1c3	16069 16126	73 (185) (228) 263 295 462 489
J1c3a	16069 16126	73 (185) (228) 263 295 462 489
J1c3a1	16069 16126	73 (185) (228) 263 295 462 489
J1c3b	16069 16126	73 (185) (228) 263 295 462 489
J1c3b1	16069 16126	73 (185) (228) 263 295 462 489
J1c3c	16069 16126 16222	73 (185) (228) 263 295 462 489
J1c3d	16069 16126	73 (185) (228) 263 295 462 489
J1c4	16069 16126	73 (185) (228) 263 295 462 489
J1c4b	16069 16126	73 (185) (228) 263 295 462 489
J1c5	16069 16126	73 (185) (228) 263 295 462 489
J1c5a	16069 16126	73 (185) (228) 263 295 462 489
J1c5d	16069 16126	73 (185) (228) 263 295 462 489
J1c6	16069 16126	73 (185) (228) 263 295 462 489
J1c-16261	16069 16126 16261	73 (185) (228) 263 295 462 489
J1c7	16069 16126 16261	73 (185) (228) 263 295 462 489
J1c7a	16069 16092 16126 16261	73 (185) (228) 263 295 462 489
J1c8	16069 16126 16319	73 (185) (228) 263 295 462 489
J1c9	16069 16126	73 (185) (228) 263 295 462 489
J1c11	16069 16126 16224	73 (185) (228) 263 295 462 489
J1d	16069 16126 16193	73 152 263 295 462 489
J1d1	16069 16126 16193 16300	73 152 263 295 462 489
J1d1a	16069 16126 16193 16300 16309	73 152 263 295 462 489
J1d2	16069 16126 16186 16193	73 152 263 295 462 489
J2	16069 16126	73 (150) (152) 263 295 489
J2a	16069 16126	73 (150) (152) 195 263 295 489
J2a1	16069 16126 16145 16231	73 (150) (152) 195 (215) 263 295 (319) 489 (513)
J2a1a	16069 16126 16145 16231 16261	73 (150) (152) 195 (215) 263 295 (319) 489 (513)
J2a1a1	16069 16126 16145 16231 16261	73 (150) (152) 195 (215) 263 295 310.1T (319) 489 (513)
J2a1a1a	16069 16126 16145 16172 16231 16261	73 (150) (152) 189 195 (215) 263 295 310.1T (319) 489 (513)
J2a1a1b	16069 16126 16145 16231 16261	73 (150) (152) 195 (215) 263 295 310.1T (319) 489 (513)
J2a2	16069 16126	73 (150) 195 263 295 489
J2a2a	16069 16126	73 (150) 195 235 263 295 489
J2b	16069 16126 16193	73 (150) (152) 263 295 489
J2b1	16069 16126 16193	73 (150) (152) 263 295 489
J2b1a	16069 16126 16193 16278	73 (150) (152) 263 295 489
J2b1a1	16069 16126 16193 16278	73 (150) (152) 263 295 489
J2b1a2	16069 16126 16193 16278	73 (150) (152) 263 295 489
J2b1a3	16069 16126 16193 16278	73 (150) (152) 263 295 489
J2b1b	16069 16126 16193	73 (150) (152) 263 295 489
T	16126 16294	73 263
T1	16126 16163 16189 16294	73 263
T1a	16126 16163 16186 16189 16294	73 263
T1a-152	16126 16163 16186 16189 16294	73 152 263
T1a1'3	16126 16163 16186 16189 16294	73 152 195 263
T1a1	16126 16163 16186 16189 16294	73 152 195 263
T1a1b	16126 16163 16186 16189 16294	73 152 195 263
T1a1b1	16126 16163 16186 16189 16294	73 152 195 263
T1a3	16126 16163 16186 16189 16294	73 152 195 263
T1a2	16126 16163 16186 16189 16294	73 152 263
T1a2a	16126 16163 16186 16189 16261 16294	73 152 263 384
T1b	16126 16163 16189 16243 16294	73 263
T2	16126 16294 (16296)	73 263
T2a	16126 16294 (16296)	73 263
T2a1	16126 16294 (16296)	73 263
T2a1a	16126 16294 (16296)	73 263
T2a1a1	16126 16294 (16296)	73 (143) 263 (524.1AC)
T2a1a2	16126 16294 (16296)	73 263
T2a1a3	16126 16294 (16296)	73 263
T2a1b	16126 16294 (16296) 16324	73 263
T2a1b1	16126 16294 (16296) 16324	73 263
T2a1b1a	16126 16294 (16296) 16324	73 263
T2b	16126 16294 (16296) 16304	73 263
T2b1	16126 16294 (16296) 16304	73 263
T2b2	16126 16294 (16296) 16304	73 263
T2b3	16126 16294 (16296) 16304	73 263
T2b3-151	16126 16294 (16296) 16304	73 151 263
T2b3a	16126 16292 16294 (16296) 16304	73 151 152 263
T2b3b	16126 16294 (16296) 16304	73 263
T2b-16296!	16126 16294 16304	73 263
T2b4	16126 16294 16304	73 263
T2b4a	16126 16172 16294 16304	73 263
T2b21	16126 16294 16304	73 152 263
T2b5	16126 16294 (16296) 16304	73 263
T2b6	16126 16294 (16296) 16304	73 263 458
T2b6a	16126 16294 (16296) 16304	73 263 458
T2b7	16126 16294 (16296) 16304	73 263
T2b8	16126 16294 (16296) 16304	73 263
T2c	16126 16292 16294 (16296)	73 263
T2c1	16126 16292 16294 (16296)	73 152 263
T2c1a	16126 16292 16294 (16296)	73 152 263
T2c1b	16126 16292 16294 (16296)	73 146 152 263 279
T2d	16126 16294 (16296)	73 152 263
T2e	16126 16153 16294 (16296)	73 150 263
T2e-16296!	16126 16153 16294	73 150 263
T2e1	16126 16153 16294	41 73 150 263
T2e2	16126 16153 16294 (16296)	73 150 263
T2f	16126 16189 16294 (16296)	73 263
T2f-195	16126 16189 16294 (16296)	73 195 263
T2f1	16126 16189 16294 (16296) 16298	73 195 263
T2g	16126 16294 (16296)	73 263
T2g1	16126 16294 (16296)	73 263
T2h	16126 16294 (16296)	73 263
R3	16129 16192 16311	73 150 241 263 513
R5	16304 16524	73 263
R5a	16266 16304 16524	73 263
R5a1	16266 16304 16524	73 93 200 263
R5a1a	16266 16304 16524	73 93 200 263
R5a2	16266 16304 16356 16524	73 152 263
R5a2a	16304 16311 16356 16524	73 152 263
R5a2b	16266 16304 16309 16325 16356 16524	73 152 263
R5a2b1	16266 16304 16309 16325 16356 16524	73 152 263
R5a2b2	16304 16309 16325 16356 16524	73 152 263
R5a2b3	16266 16304 16309 16325 16356 16524	73 152 263
R5a2b4	16266 16304 16309 16325 16356 16524	73 152 263
R6	16274 16362	73 195 263
R6a	16129 16266 16274 16362	73 195 263
R6a1	16129 16266 16274 16362	73 195 228 263
R6a1a	16129 16266 16318 16320 16362	73 228 263 373
R7	16319 16362	73 263
R7a'b	16260 16261 16319 16362	73 263
R7a	16260 16261 16319 16362	73 263
R7a1	16260 16261 16319 16362	73 263
R7a1a	16146 16260 16261 16319 16362	73 263
R7a1b	16260 16261 16319 16362	73 263
R7a1b1	16075 16260 16261 16319 16362	73 263
R7a1b2	16260 16261 16319 16362 16390	73 263
R7b	16260 16261 16311 16319 16362	73 146 263
R7b1	16260 16261 16311 16319 16362	73 146 263
R7b1a	16260 16261 16311 16319 16362	73 146 152 263
R7b1a1	16260 16261 16311 16319 16362	73 146 152 263
R7b2	16260 16261 16311 16319 16362	73 146 263
R8	rCRS	73 195 263
R8a	rCRS	73 195 263
R8a1	rCRS	73 195 263
R8a1a	rCRS	73 195 263
R8a1a1	rCRS	73 195 263
R8a1a1a	rCRS	73 195 263
R8a1a1b	16153	73 195 263
R8a1a1c	rCRS	73 195 263
R8a1a1d	16390	73 195 263
R8a1a2	16324	73 195 263
R8a1a2a	16324	73 195 263
R8a1a3	16292	73 195 263
R8a1-16093	16093	73 195 263
R8a1b	16093	73 195 263
R8a2	rCRS	73 185 189 263
R8b	16390	73 195 263 456
R8b1	16390	73 154 195 263 456
R8b1a	16390	73 154 195 263 456
R8b2	16172 16390	73 150 195 263 456 456.1T
R9	16304	73 263
R9b	16304	73 263
R9b1	16304 16309 16390	73 263
R9b1a	(16192) 16304 16309 16390	73 183 263
R9b1a1	(16192) 16304 16309 16390	73 143 183 263
R9b1a1a	(16192) 16288 16304 16309 16390	73 143 183 263
R9b1a2	16145 (16192) 16243 16304 16309 16390	73 183 263
R9b1a3	(16192) 16304 16309 16390	73 183 263
R9b1b	16124 16148 16304 16309 16390	73 263
R9b2	16304 16362	73 263
R9c	16304	73 249d 263
R9c1	16157 16304	73 249d 263
R9c1a	16157 16256 16304 16335	73 249d 263
F	16304	73 249d 263
F1	16304	73 249d 263
F1a'c'f	16129 16304	73 249d 263
F1a	16129 16172 16304	73 249d 263
F1a1'4	16129 16172 16304	73 249d 263
F1a1	16129 16162 16172 16304	73 249d 263
F1a1a	16108 16129 16162 16172 16304	73 249d 263
F1a1a1	16108 16129 16162 16172 16304	73 249d 263
F1a1b	16129 16162 16172 16304	64 73 249d 263
F1a1c	16129 16162 16172 16304	73 249d 263 548
F1a1c1	16129 16162 16172 16224 16304	73 195 249d 263 548
F1a1d	16129 16162 16172 16304 16399	73 249d 263
F1a4	16129 16172 16304 16362	73 152 249d 263
F1a4a	16129 16172 16294 16304 16362	73 152 249d 263
F1a2	16172 16304	73 249d 263
F1a3	16129 16172 16304	73 249d 263
F1a3a	16129 16172 16304 16311	73 249d 263
F1a3a1	16172 16284 16304 16311 16390	73 249d 263
F1c	16129 16304	73 249d 263
F1c1	16129 16304	73 152 249d 263
F1c1a	16111 16129 16304	73 152 249d 263
F1f	16129 16172 16304	73 249d 263
F1-16189	16189 16304	73 249d 263
F1b	16189 16232A 16249 16304 16311	73 152 249d 263
F1b1	16189 16232A 16249 16304 16311	73 152 249d 263
F1b1a	16129 16189 16232A 16249 16304 16311 16344	73 152 249d 263
F1b1a1	16129 16189 16232A 16249 16304 16311 16344	73 152 249d 263
F1b1a1a	16129 16189 16232A 16249 16304 16311 16344	73 152 249d 263
F1b1a1a1	16129 16189 16232A 16249 16304 16311 16344	73 152 249d 263
[truncated: 522 more rows]
